# Supplementary material
Source: PubMed Central journal article supplement (PMC3401491)
Supplement: NIHMS388265-supplement-1_si_001.pdf [file NIHMS388265-supplement-1_si_001.pdf]

# Diastereoselective Chelation-Controlled

## Additions to $\beta$ -Silyloxy Aldehydes

Gretchen R. Stanton, Meara C. Kauffman, and Patrick J. Walsh\*

P. Roy and Diana T. Vagelos Laboratories, University of Pennsylvania, Department of

Chemistry, 231 S. 34<sup>th</sup> Street, Philadelphia, PA 19104-6323

pwalsh@sas.upenn.edu

| Table of Contents                                                                                              | Page |
|----------------------------------------------------------------------------------------------------------------|------|
| I. General Methods.....                                                                                        | 1    |
| II. Diastereoselective Dialkylzinc Addition to $\beta$ -Silyloxy Aldehydes .....                               | 2    |
| III. Addition of ( <i>E</i> )-Di- and Tri-substituted Vinyl Zinc Additions to $\beta$ -Silyloxy Aldehydes..... | 3    |
| IV. Determination of the Absolute Configuration.. ..                                                           | 8    |
| V. <sup>1</sup> H NMR and <sup>13</sup> C{ <sup>1</sup> H} NMR spectra.....                                    | 11   |

### I. General Methods

All reactions were performed under N<sub>2</sub> atmosphere using flame-dried glassware and standard Schlenk and vacuum line techniques. The progress of reactions were monitored by thin-layer chromatography (TLC) using Whatman precoated silica gel 60 F-254 plates and visualized by staining with ceric ammonium molybdate or 4-dinitrophenylhydrazine stains or ultra-violet light. Toluene and dichloromethane were passed through alumina columns and degassed before use. Alkyl zinc halides and dicyclohexyl borane were prepared using literature procedures.<sup>1,2</sup> The aldehydes<sup>3,4</sup> were prepared within one day of use or stored at -16 °C under nitrogen atmosphere. The <sup>1</sup>H NMR and <sup>13</sup>C{<sup>1</sup>H} NMR spectra were obtained using a Bruker AM-500 Fourier transform NMR spectrometer at 500 and 125 MHz, respectively. <sup>1</sup>H NMR were referenced to tetramethylsilane in CDCl<sub>3</sub>, and <sup>13</sup>C{<sup>1</sup>H} NMR spectra were referenced to residual solvent. Coupling constants are reported in hertz. The infrared spectra were obtained using a Perkin-Elmer 1600 series spectrometer. The optical rotations were recorded using a JASCO DIP-370. Silica gel (230-400 mesh, Silicycle) was used for flash chromatography. Reagents were obtained from TCI America, Acros, Sigma-Aldrich, or GFS Chemicals and used without further purification. Analysis of diastereomeric ratios was performed by gas chromatography using a

<sup>1</sup> Fabicon, R. N.; Richey, H. G. *Organometallics* **2001**, *19*, 4018-4023.

<sup>2</sup> Oppolzer, W.; Schroeder, F.; Kahl, S. *Helv. Chim. Acta.* **1997**, *80*, 2047-2056.

<sup>3</sup> Roush, W. R.; Palkowitz, A. D.; Ando, K. J. *J. Am. Chem. Soc.* **1990**, *112*, 63.

<sup>4</sup> Smith, A. B., III.; Brandt, B. M. *Org. Lett.* **2001**, *3*, 1685-1688.

Hewlett-Packard 6890 GC with a Beta-Dex Column or by  $^1\text{H}$  NMR of the crude or purified reaction products. High resolution mass spectra were measured using a Waters LCTOF- Xe Premier ESI mass spectrometer. Relative stereochemistry was confirmed by modified Mosher ester analysis.<sup>5,6,7</sup>

## II. Diastereoselective Dialkylzinc Addition to $\beta$ -Silyloxy Aldehydes

**General Procedure A:** A 10 mL Schlenk equipped with magnetic stirrer and septum was flame-dried under vacuum and back-filled with  $\text{N}_2$ . To the flask was added  $\text{R}_2\text{Zn}$  (0.670 mmol, neat) and  $\text{CH}_2\text{Cl}_2$  (0.3 mL). The flask was cooled to  $-78^\circ\text{C}$  in a dry ice/acetone bath. Triflic acid (33  $\mu\text{L}$ , 0.371 mmol) was added dropwise, and the reaction was allowed to stir at  $-78^\circ\text{C}$  for 5 min. The reaction was then stirred at rt for 45 min to 1 h and then cooled to  $0^\circ\text{C}$ . A solution of aldehyde (0.247 mmol) in dichloromethane (0.19 mL) was added dropwise and the reaction was allowed to slowly warm to rt. After 16 h, the reaction was quenched with a saturated solution of  $\text{NH}_4\text{Cl}$  (15 mL) and extracted with diethyl ether (3 x 10 mL). The combined organic layers were washed with brine, dried over  $\text{MgSO}_4$ , and filtered. The crude products were concentrated *in vacuo* and added to a silica gel column.

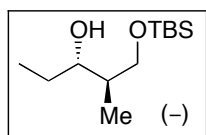

### **(2R,3S)-1-((*tert*-Butyldimethylsilyl)oxy)-2-methylpentan-3-ol (2).**<sup>8</sup>

Procedure A was applied to  $\text{Et}_2\text{Zn}$  (0.67 mL, 1.34 mmol, 2M in  $\text{CH}_2\text{Cl}_2$ ), triflic acid (66  $\mu\text{L}$ , 0.75 mmol), and (*R*)-3-((*tert*-butyldimethylsilyl)oxy)-2-methylpropanal (98.0 mg, 0.484 mmol, in 0.3 mL  $\text{CH}_2\text{Cl}_2$ ). The crude products were concentrated *in vacuo* and added to a silica gel column. The crude product was purified by flash chromatography (EtOAc:hexanes, 1:49 to 1:24) to afford the title compound as a clear oil (87.5 mg, 78% yield, dr 15.4:1). The major diastereomer was separated and characterized.  $[\alpha]_D^{20} = -20.6$  ( $c = 1.15$ ,  $\text{CHCl}_3$ ).  $^1\text{H}$  NMR ( $\text{CDCl}_3$ , 500 MHz):  $\delta$  0.08 (s, 3H), 0.85 (d,  $J = 7.0$  Hz, 3H), 0.90 (s, 9H), 0.97 (t,  $J = 7.5$  Hz, 3H), 1.44 (m, 1H), 1.58, (m, 1H), 1.71 (m, 1H), 3.45 (m, 1H), 3.58 (dd,  $J = 7.5$  Hz, 10.0 Hz, 1H), 3.68 (bs, 1H), 3.79 (dd,  $J = 4.1$  Hz, 10.0 Hz, 1H).  $^{13}\text{C}\{^1\text{H}\}$  ( $\text{CDCl}_3$ , 125 MHz):  $\delta$  -5.46, -5.53, 9.8, 13.8, 18.3, 26.0, 28.0, 39.4, 68.6, 78.0. IR (neat): 3445, 2958, 2930, 2858, 1471, 1463, 1256, 1084, 850  $\text{cm}^{-1}$ . HRMS calcd for  $\text{C}_{12}\text{H}_{29}\text{O}_2\text{Si}$  (MH)<sup>+</sup>: 233.1937, found 233.1943. GC condition for TMS-protected **2**: Supelco Beta Dex 120 fused silica capillary column 60 m x 0.25 mm x 0.25  $\mu\text{m}$  film thickness,  $t = 30.3$  min,  $t = 33.7$  min (oven:  $98^\circ\text{C}$ , 1.4 mL/min).

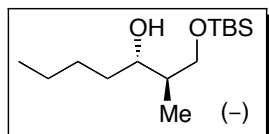

### **(2R,3S)-1-((*tert*-Butyldimethylsilyl)oxy)-2-methylheptan-3-ol (3).**

A 10 mL Schlenk equipped with magnetic stirrer and septum was flame-dried under vacuum and back-filled with  $\text{N}_2$ . To the flask was added *n*- $\text{Bu}_2\text{Zn}$  (1.11 mL, 1.11 mmol, 1M in heptane). The septum was replaced with a glass stopper, and the flask was evacuated for 3 min and back-filled with  $\text{N}_2$  3 times. The glass stopper was replaced with a septum, and  $\text{CH}_2\text{Cl}_2$  (0.25 mL) was added. The rest of the

<sup>5</sup> Ohtani, I.; Kusumi, T.; Kashman, Y.; Kakisawa, H. *J. Am. Chem. Soc.* **1991**, *11*, 4092-4096.

<sup>6</sup> Dale, J. A.; Mosher, H. S. *J. Am. Chem. Soc.* **1968**, *14*, 3732-3738.

<sup>7</sup> Hoye, T. R.; Jeffrey, C. S.; Shao, F. *Nat. Protoc.* **2007**, *2*, 2451-2458.

<sup>8</sup> Riatto, V. B. Pilli, R. A. *J. Braz. Chem. Soc.* **1999**, *10*, 363-368.

procedure is the same as General Procedure A employing triflic acid (33  $\mu\text{L}$ , 0.371 mmol) and (*R*)-3-((*tert*-butyldimethylsilyl)oxy)-2-methylpropanal (50.0 mg, 0.247 mmol, in 0.25 mL  $\text{CH}_2\text{Cl}_2$ ). The crude products were concentrated *in vacuo* and added to a silica gel column. The crude product was purified by flash chromatography (EtOAc:hexanes, 1:49 to 1:24) to afford the title compound as a clear oil (46.7 mg, 73% yield, dr 16:1). The major diastereomer was separated and characterized.  $[\alpha]_D^{20} = -24.2$  ( $c = 1.03$ ,  $\text{CHCl}_3$ ).  $^1\text{H NMR}$  ( $\text{CDCl}_3$ , 500 MHz):  $\delta$  0.08 (s, 6H), 0.85 (d,  $J = 7.0$  Hz, 3H), 0.90 (m, 12H), 1.42 (m, 6H), 1.7 (m, 1H), 3.52 (m, 1H), 3.57 (dd,  $J = 7.7$  Hz, 10.0 Hz, 1H), 3.80 (dd,  $J = 4.0$  Hz, 10.0 Hz, 1H), 3.84 (d,  $J = 3.2$  Hz, 1H).  $^{13}\text{C}\{^1\text{H}\}$  ( $\text{CDCl}_3$ , 125 MHz):  $\delta$  -5.5, -5.4, 13.8, 14.3, 18.3, 23.1, 26.0, 27.7, 35.1, 40.0, 68.8. IR (neat): 3446, 2931, 2859, 1471, 1464, 1255, 1090, 837, 777  $\text{cm}^{-1}$ . HRMS calcd for  $\text{C}_{14}\text{H}_{33}\text{O}_2\text{Si}$  (MH) $^+$ : 261.2250, found 261.2244.

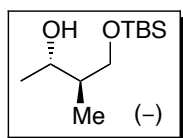

**(2*S*,3*R*)-4-((*tert*-Butyldimethylsilyl)oxy)-3-methylbutan-2-ol (4).**<sup>9</sup> General Procedure A was applied to  $\text{Me}_2\text{Zn}$  (88  $\mu\text{L}$ , 0.670 mmol, neat), triflic acid (33  $\mu\text{L}$ , 0.371 mmol), and (*R*)-3-((*tert*-butyldimethylsilyl)oxy)-2-methylpropanal (50.0 mg, 0.247 mmol, in 0.19 mL  $\text{CH}_2\text{Cl}_2$ ). The crude products were concentrated *in vacuo* and added to a silica gel column. The crude product was purified by flash chromatography (EtOAc:hexanes, 1:49) to afford the title compound as a clear oil (33.3 mg, 62% yield, dr 5:1). The product was characterized as a 5:1 mixture of diastereomers.  $^1\text{H NMR}$  ( $\text{CDCl}_3$ , 500 MHz) major:  $\delta$  0.08 (s, 6H), 0.81 (d,  $J = 7.0$  Hz, 3H), 0.90 (s, 9H), 1.18 (d,  $J = 6.30$  Hz, 3H), 1.65 (m, 1H), 3.55 (dd,  $J = 8.5$  Hz, 10.0 Hz, 1H), 3.69 (m, 1H), 3.78 (dd,  $J = 4.1$  Hz, 10.2 Hz, 1H), 3.98 (d,  $J = 2.3$  Hz, 1H).  $^{13}\text{C}\{^1\text{H}\}$  ( $\text{CDCl}_3$ , 125 MHz) major:  $\delta$  -5.5, -5.4, 13.5, 18.3, 21.5, 26.0, 41.6, 69.2, 73.4. IR (neat): 3435, 2958, 2930, 2859, 1472, 1463, 1256, 1079, 836, 776  $\text{cm}^{-1}$ . HRMS calcd for  $\text{C}_7\text{H}_{17}\text{O}_2\text{Si}$  (M-C<sub>4</sub>H<sub>9</sub>) $^+$ : 161.0998, found 161.0997.

### III. Diastereoselective Addition of (*E*)-Di- and Tri-substituted Vinyl Zinc Additions to $\beta$ -Silyloxy Aldehydes

**General Procedure B (Preparation of EtZnOTf and EtZnONf):** To a flame-dried 25 mL Schlenk flask equipped with magnetic stirrer and septum was added  $\text{Et}_2\text{Zn}$  (0.2 mL, 0.4 mmol, 2 M in  $\text{CH}_2\text{Cl}_2$ ). The solution was cooled to  $-78$   $^\circ\text{C}$  in a dry ice/acetone bath, and triflic acid or nonafluorobutane-1-sulfonic acid (0.371 mmol) was added dropwise. The reaction was allowed to stir and  $-78$   $^\circ\text{C}$  for 5 min and was then warmed to rt and stirred for 1 h. The septum was replaced with a glass stopper, and the solvent was removed under reduced pressure.

**General Procedure C:** A 10 mL Schlenk flask equipped with magnetic stirrer and septum was flame-dried under vacuum and back-filled with  $\text{N}_2$ . To the flask was added  $\text{HBCy}_2$  (43 mg, 0.24 mmol) and  $\text{CH}_2\text{Cl}_2$ . The flask was cooled to 0  $^\circ\text{C}$ , and the alkyne (0.24 mmol) was added dropwise. The reaction mixture was allowed to stir at 0  $^\circ\text{C}$  for 5 min and then stirred at rt for 15 min. The flask was cooled to  $-78$   $^\circ\text{C}$ ,  $\text{Et}_2\text{Zn}$  (.12 mL, 2M in toluene) was added dropwise, and the reaction mixture was allowed to stir at  $-78$   $^\circ\text{C}$  for 30 min. EtZnONf (118 mg, 0.3 mmol) was added at  $-78$   $^\circ\text{C}$ , and the flask was transferred to a cooling bath at  $-15$   $^\circ\text{C}$ . The aldehyde (0.2

<sup>9</sup> Tanner, D.; Somfai, P. *Tetrahedron* **1987**, *43*, 4395-4406.

mmol) was added dropwise as a solution in toluene, and the reaction was allowed to stir at  $-15^{\circ}\text{C}$  for 14–18 h. The reaction was quenched with a saturated solution of  $\text{NH}_4\text{Cl}$  (15 mL) and extracted with diethyl ether (3 x 10 mL). The combined organic layers were washed with brine, dried over  $\text{MgSO}_4$ , and filtered. The crude products were concentrated *in vacuo* and purified by flash-chromatography on silica gel.

**General Procedure D:** The procedure follows General Procedure C, except  $\text{EtZnOTf}$  (73 mg, 0.3 mmol) is employed.

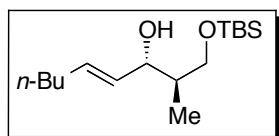

**2*R*,3*S*,*E*)-1-((*tert*-Butyldimethylsilyl)oxy)-2-methylnon-4-en-3-ol (5).**<sup>10</sup> General Procedure C was applied to  $\text{HBCy}_2$  (2.7 mg, 0.296 mmol),  $\text{CH}_2\text{Cl}_2$  (0.41 mL), 1-hexyne (34  $\mu\text{L}$ , 0.296 mmol),  $\text{Et}_2\text{Zn}$  (0.15 mL, 0.30 mmol),  $\text{EtZnONf}$  (146 mg, 0.371 mmol), (*R*)-3-((*tert*-butyldimethylsilyl)oxy)-2-methylpropanal (50.0 mg, 0.247 mmol), and toluene (0.26 mL). The crude product was purified by flash chromatography ( $\text{EtOAc}$ :hexanes, 1:50 to 1:25) to afford the title compound as a clear oil (43.2 mg, 64% yield, dr 10:1). The product was characterized as a 10:1 mixture of diastereomers.  $^1\text{H}$  NMR ( $\text{CDCl}_3$ , 500 MHz) major:  $\delta$  0.08 (s, 6H), 0.81 (d,  $J = 7.1$  Hz, 3H), 0.89 (t,  $J = 7.0$  Hz, 3H), 0.90 (s, 9H), 1.34 (m, 4H), 1.74 (m, 1H), 2.05 (m, 2H), 3.57 (dd,  $J = 7.7$  Hz, 9.9 Hz, 1H), 3.74 (d,  $J = 3.0$  Hz, 1H), 3.78 (dd,  $J = 4.3$  Hz, 10.1 Hz, 1H), 3.95 (m, 1H), 5.44 (dd,  $J = 7.2$  Hz, 15.3 Hz, 1H), 5.66 (m, 1H).  $^{13}\text{C}\{^1\text{H}\}$  ( $\text{CDCl}_3$ , 125 MHz) major:  $-5.4$ , 13.7, 14.1, 18.3, 22.5, 26.0, 31.6, 32.1, 40.3, 68.4, 78.4, 131.7, 133.1.  $\delta$  IR (neat): 3432, 2957, 2929, 2858, 1670, 1471, 1255, 1095, 1006, 970, 836, 776  $\text{cm}^{-1}$ . HRMS calcd for  $\text{C}_{16}\text{H}_{33}\text{OSi}$  (M–OH)<sup>+</sup>: 269.2301, found 269.2290.

General Procedure D was applied to  $\text{HBCy}_2$  (2.7 mg, 0.296 mmol),  $\text{CH}_2\text{Cl}_2$  (0.41 mL), 1-hexyne (34  $\mu\text{L}$ , 0.296 mmol),  $\text{Et}_2\text{Zn}$  (0.15 mL, 0.30 mmol),  $\text{EtZnOTf}$  (90 mg, 0.371 mmol), (*R*)-3-((*tert*-butyldimethylsilyl)oxy)-2-methylpropanal (50.0 mg, 0.247 mmol), and toluene (0.26 mL). The crude product was purified by flash chromatography ( $\text{EtOAc}$ :hexanes, 1:50 to 1:25) to afford the title compound as a clear oil (56.0 mg, 79% yield, dr 4:1).

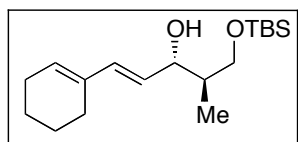

**(3*S*,4*R*,*E*)-5-((*tert*-Butyldimethylsilyl)oxy)-1-(cyclohex-1-en-1-yl)-4-methylpent-1-en-3-ol (6).** General Procedure C was applied to  $\text{HBCy}_2$  (93.4 mg, 0.524 mmol),  $\text{CH}_2\text{Cl}_2$  (0.71 mL), 1-ethynylcyclohexene (62  $\mu\text{L}$ , 0.524 mmol),  $\text{Et}_2\text{Zn}$  (0.26 mL, 0.52 mmol),  $\text{EtZnONf}$  (258 mg, 0.656 mmol), (*R*)-3-((*tert*-butyldimethylsilyl)oxy)-2-methylpropanal (88.5 mg, 0.437 mmol), and toluene (0.47 mL). The crude product was purified by flash chromatography ( $\text{EtOAc}$ :hexanes, 1:50 to 1:25) to afford the title compound as a clear oil (90 mg, 66% yield, dr 5.8:1). The product was characterized as a 5.8:1 mixture of diastereomers.  $^1\text{H}$  NMR ( $\text{CDCl}_3$ , 500 MHz) major:  $\delta$  0.08 (s, 1H), 0.83 (d,  $J = 7.0$  Hz, 3H), 0.91 (s, 9H), 1.64 (m, 4H), 1.78 (m, 1H), 2.13 (bs, 4H), 3.58 (dd,  $J = 7.4$  Hz, 10.0 Hz, 1H), 3.73 (d,  $J = 3.1$  Hz, 1H), 3.79 (dd,  $J = 4.2$  Hz, 10.1 Hz, 1H), 4.04 (m, 1H), 5.53 (dd,  $J = 7.6$  Hz, 16.0 Hz, 1H), 5.74 (bs,

<sup>10</sup> Wipf, P.; Xu, W. *J. Org. Chem.* **1993**, *58*, 825-826.

1H), 6.21 (d,  $J = 15.5$  Hz, 1H).  $^{13}\text{C}\{^1\text{H}\}$  ( $\text{CDCl}_3$ , 125 MHz) major:  $\delta -5.36, -5.44, 11.6, 13.8, 18.3, 22.7, 22.8, 24.8, 26.0, 40.6, 68.3, 78.4, 127.2, 129.7, 135.1, 135.4$ . IR (neat): 3429, 2929, 2857, 1651, 1625, 1471, 1463, 1255, 1092, 1006, 965, 814, 776, 667  $\text{cm}^{-1}$ . HRMS calcd for  $\text{C}_{18}\text{H}_{35}\text{O}_2\text{Si}$  ( $\text{MH}^+$ ): 311.2406, found 311.2412.

General Procedure D was applied to  $\text{HBCy}_2$  (93.4 mg, 0.524 mmol),  $\text{CH}_2\text{Cl}_2$  (0.71 mL), 1-ethynylcyclohexene (62  $\mu\text{L}$ , 0.524 mmol),  $\text{Et}_2\text{Zn}$  (0.26 mL, 0.52 mmol),  $\text{EtZnOTf}$  (160 mg, 0.656 mmol), (*R*)-3-((*tert*-butyldimethylsilyl)oxy)-2-methylpropanal (88.5 mg, 0.437 mmol), and toluene (0.47 mL). The crude product was purified by flash chromatography (EtOAc:hexanes, 1:50 to 1:25) to afford the title compound as a clear oil (68.3 mg, 50% yield, dr 2.3:1).

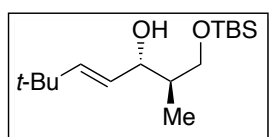

**(2*R*,3*S*,*E*)-1-((*tert*-Butyldimethylsilyl)oxy)-2,6,6-trimethylhept-4-en-3-ol (7).** General Procedure C was applied to  $\text{HBCy}_2$  (97.1 mg, 0.545 mmol),  $\text{CH}_2\text{Cl}_2$  (0.76 mL), 3,3-dimethyl butyne (67  $\mu\text{L}$ , 0.545 mmol),  $\text{Et}_2\text{Zn}$  (0.27 mL, 0.545 mmol),  $\text{EtZnONf}$  (268 mg, 0.681 mmol), (*R*)-3-((*tert*-butyldimethylsilyl)oxy)-2-methylpropanal (91.9 mg, 0.454 mmol), and toluene (0.49 mL). The crude product was purified by flash chromatography (EtOAc:hexanes, 1:50 to 1:25) to afford the title compound as a clear oil (86.0 mg, 70% yield, dr 10:1). The product was characterized as a 10:1 mixture of diastereomers.  $^1\text{H}$  NMR ( $\text{CDCl}_3$ , 500 MHz) major:  $\delta$  0.08 (s, 6H), 0.79 (d,  $J = 7.0$  Hz, 3H), 0.91 (s, 9H), 1.02 (s, 9H), 1.75 (m, 1H), 3.56 (dd,  $J = 7.9$  Hz, 9.7 Hz, 1H), 3.79 (dd,  $J = 4.0$  Hz, 9.9 Hz, 1H), 3.82 (d,  $J = 2.7$  Hz, 1H), 3.95 (m, 1H), 5.34 (dd,  $J = 7.4$  Hz, 15.8 Hz, 1H), 5.68 (d,  $J = 15.6$  Hz, 1H).  $^{13}\text{C}\{^1\text{H}\}$  ( $\text{CDCl}_3$ , 125 MHz) major:  $\delta -5.5, -5.4, 13.7, 18.3, 26.0, 29.8, 33.0, 40.3, 68.5, 78.7, 126.4, 143.9$ . IR (neat): 3438, 2859, 1662, 1472, 1463, 1362, 1256, 1095, 1024, 1006, 974, 836, 776  $\text{cm}^{-1}$ . HRMS calcd for  $\text{C}_{16}\text{H}_{33}\text{OSi}$  ( $\text{M-OH}^+$ ): 269.2301, found 269.2312.

General Procedure D was applied to  $\text{HBCy}_2$  (97.1 mg, 0.545 mmol),  $\text{CH}_2\text{Cl}_2$  (0.76 mL), 3,3-dimethyl butyne (67  $\mu\text{L}$ , 0.545 mmol),  $\text{Et}_2\text{Zn}$  (0.27 mL, 0.545 mmol),  $\text{EtZnOTf}$  (166 mg, 0.681 mmol), (*R*)-3-((*tert*-butyldimethylsilyl)oxy)-2-methylpropanal (91.9 mg, 0.454 mmol), and toluene (0.49 mL). The crude product was purified by flash chromatography (EtOAc:hexanes, 1:50 to 1:25) to afford the title compound as a clear oil (86.0 mg, 70% yield, dr 3.6:1).

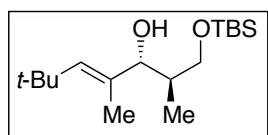

**(2*R*,3*R*,*E*)-1-((*tert*-Butyldimethylsilyl)oxy)-2,4,6,6-tetramethylhept-4-en-3-ol (8).** General Procedure A was applied to  $\text{HBCy}_2$  (52.7 mg, 0.296 mmol),  $\text{CH}_2\text{Cl}_2$  (0.41 mL), 4,4-dimethyl-2-pentyne (40  $\mu\text{L}$ , 0.30 mmol),  $\text{Et}_2\text{Zn}$  (0.15 mL, 0.30 mmol),  $\text{EtZnOTf}$  (90.2 mg, 0.371 mmol), (*R*)-3-((*tert*-butyldimethylsilyl)oxy)-2-methylpropanal (50.0 mg, 0.247 mmol), and toluene (0.26 mL). The crude product was purified by flash chromatography (EtOAc:hexanes, 1:50 to 1:25) to afford the title compound as a clear oil (59 mg, 80% yield, dr > 20:1).  $[\alpha]_D^{20} = -29.7$  ( $c = 1.03$ ,  $\text{CHCl}_3$ ).  $^1\text{H}$  NMR ( $\text{CDCl}_3$ , 500 MHz):  $\delta$  0.09 (s, 6H), 0.69 (d,  $J = 6.9$  Hz, 3H), 0.91 (s, 9H), 1.12 (s, 9H), 1.71 (s, 3H), 1.84 (m, 1H), 3.58 (t,  $J = 8.4$  Hz, 1H), 3.74 (d,  $J = 8.7$  Hz, 1H), 3.79 (dd,  $J = 4.0$  Hz, 9.9 Hz, 1H), 4.02 (bs, 1H), 5.39 (s, 1H).  $^{13}\text{C}\{^1\text{H}\}$  ( $\text{CDCl}_3$ , 125 MHz):  $\delta -5.5, -5.4, 12.1, 13.8, 18.3, 26.0, 31.0, 32.4, 37.5, 69.2, 85.8, 134.4, 138.5$ . IR (neat): 3445, 2931, 2859,

1660, 1471, 1464, 1254, 1091, 1006, 836, 777  $\text{cm}^{-1}$ . HRMS calcd for  $\text{C}_{17}\text{H}_{36}\text{O}_2\text{NaSi}$  ( $\text{M} + \text{Na}$ )<sup>+</sup>: 323.2382, found 323.2379.

General Procedure D was applied to  $\text{HBCy}_2$  (52.7 mg, 0.296 mmol),  $\text{CH}_2\text{Cl}_2$  (0.41 mL), 4,4-dimethyl-2-pentyne (40  $\mu\text{L}$ , 0.30 mmol),  $\text{Et}_2\text{Zn}$  (0.15 mL, 0.30 mmol),  $\text{EtZnOTf}$  (90.2 mg, 0.371 mmol), (*R*)-3-((*tert*-butyldimethylsilyl)oxy)-2-methylpropanal (50.0 mg, 0.247 mmol), and toluene (0.26 mL). The crude product was purified by flash chromatography ( $\text{EtOAc}$ :hexanes, 1:50 to 1:25) to afford the title compound as a clear oil (56.9 mg, 79% yield, dr 11:1).

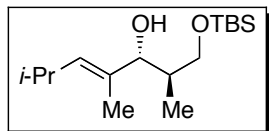

**(2*R*,3*R*,*E*)-1-((*tert*-Butyldimethylsilyl)oxy)-2,4,6-trimethylhept-4-en-3-ol (9).** General Procedure C was applied to  $\text{HBCy}_2$  (88 mg, 0.494 mmol),  $\text{CH}_2\text{Cl}_2$  (0.41 mL), 4-methyl-2-pentyne (57  $\mu\text{L}$ , 0.494 mmol),  $\text{Et}_2\text{Zn}$  (0.25 mL, 0.50 mmol),  $\text{EtZnONf}$  (146 mg, 0.371 mmol), (*R*)-3-((*tert*-butyldimethylsilyl)oxy)-2-methylpropanal (50.0 mg, 0.247 mmol), and toluene (0.16 mL). The crude product was purified by flash chromatography ( $\text{EtOAc}$ :hexanes, 1:50 to 1:25) to afford the title compound as a clear oil (55 mg, 78% yield, dr 17:1). The major diastereomer was separated and characterized.  $[\alpha]_D^{20} = -23.0$  ( $c = 0.847$ ,  $\text{CHCl}_3$ ).  $^1\text{H}$  NMR ( $\text{CDCl}_3$ , 500 MHz):  $\delta$  0.09 (s, 6H), 0.70 (d,  $J = 7.0$  Hz, 3H), 0.91 (s, 9H), 0.93 (d,  $J = 6.6$  Hz, 3H), 0.97 (d,  $J = 6.6$  Hz, 3H), 1.61 (d,  $J = 1.2$  Hz, 3H), 1.85 (m, 1H), 2.55 (m, 1H), 3.58 (dd,  $J = 8.1$  Hz, 9.8 Hz, 1H), 3.79 (m, 2H), 3.98 (d,  $J = 2.2$  Hz, 1H), 5.20 (d,  $J = 9.3$  Hz, 1H).  $^{13}\text{C}\{^1\text{H}\}$  ( $\text{CDCl}_3$ , 125 MHz):  $\delta$  -5.5, -5.4, 11.2, 13.8, 18.3, 23.1, 23.1, 26.0, 27.0, 37.5, 69.0, 84.2, 133.4, 136.0. IR (neat): 3452, 2930, 2859, 1669, 1464, 1254, 1089, 1006, 836, 777  $\text{cm}^{-1}$ . HRMS calcd for  $\text{C}_{16}\text{H}_{33}\text{OSi}$  ( $\text{M} - \text{OH}$ )<sup>+</sup>: 269.2301, found 269.2300.

General Procedure D was applied to  $\text{HBCy}_2$  (88 mg, 0.494 mmol),  $\text{CH}_2\text{Cl}_2$  (0.41 mL), 4-methyl-2-pentyne (57  $\mu\text{L}$ , 0.494 mmol),  $\text{Et}_2\text{Zn}$  (0.25 mL, 0.50 mmol),  $\text{EtZnOTf}$  (90.3 mg, 0.371 mmol), (*R*)-3-((*tert*-butyldimethylsilyl)oxy)-2-methylpropanal (50.0 mg, 0.247 mmol), and toluene (0.16 mL). The crude product was purified by flash chromatography ( $\text{EtOAc}$ :hexanes, 1:50 to 1:25) to afford the title compound as a clear oil (54.6 mg, 77% yield, dr 7.7:1).

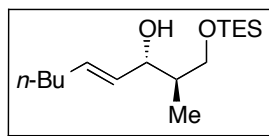

**(2*R*,3*S*,*E*)-1-((Triethylsilyl)oxy)-2-methylnon-4-en-3-ol (10).** General Procedure A was applied to  $\text{HBCy}_2$  (71.2 mg, 0.400 mmol),  $\text{CH}_2\text{Cl}_2$  (0.55 mL), 1-hexyne (46  $\mu\text{L}$ , 0.400 mmol),  $\text{Et}_2\text{Zn}$  (0.20 mL, 0.40 mmol),  $\text{EtZnONf}$  (197 mg, 0.500 mmol), (*R*)-3-((triethylsilyl)oxy)-2-methylpropanal (67.1 mg, 0.332 mmol), and toluene (0.35 mL). The crude product was purified by flash chromatography ( $\text{EtOAc}$ :hexanes, 1:50 to 1:25) to afford the title compound as a clear oil (62 mg, 66% yield, dr 11:1). The product was characterized as a 6.2:1 mixture of diastereomers.  $^1\text{H}$  NMR ( $\text{CDCl}_3$ , 500 MHz) major:  $\delta$  0.62 (q, 6H), 0.81 (d,  $J = 7.0$  Hz, 3H), 0.89 (t,  $J = 7.1$  Hz, 3H), 0.97 (t,  $J = 8.0$  Hz, 9H), 1.34 (m, 4H), 1.77 (m, 1H), 2.05 (m, 2H), 3.58 (dd,  $J = 7.9$  Hz,  $J = 10.0$  Hz, 1H), 3.78 (dd,  $J = 4.2$  Hz,  $J = 10.0$  Hz, 1H), 3.88 (d,  $J = 2.8$  Hz, 1H), 3.94 (m, 1H), 5.44 (dd,  $J = 7.5$  Hz,  $J = 15.4$  Hz, 1H), 5.66 (m, 1H).  $^{13}\text{C}\{^1\text{H}\}$  ( $\text{CDCl}_3$ , 125 MHz) major:  $\delta$  4.4, 6.9, 13.7, 14.1, 22.4, 31.6, 32.1, 40.3, 68.2, 78.6, 131.7, 133.1. IR (neat): 3435, 2915, 2876, 1670, 1458, 1415, 1239, 1093, 1008, 970, 804, 745  $\text{cm}^{-1}$ . HRMS calcd for  $\text{C}_{16}\text{H}_{34}\text{O}_2\text{NaSi}$  ( $\text{M} + \text{Na}$ )<sup>+</sup>: 309.2226, found 309.2238.

Procedure A was applied to HBCy<sub>2</sub> (71.2 mg, 0.400 mmol), CH<sub>2</sub>Cl<sub>2</sub> (0.55 mL), 1-hexyne (46 μL, 0.400 mmol), Et<sub>2</sub>Zn (0.20 mL, 0.40 mmol), EtZnOTf (122 mg, 0.500 mmol), (*R*)-3-((triethylsilyl)oxy)-2-methylpropanal (67.1 mg, 0.332 mmol), and toluene (0.35 mL). The crude product was purified by flash chromatography (EtOAc:hexanes, 1:50 to 1:25) to afford the title compound as a clear oil (57.3 mg, 60% yield, dr 6.2:1).

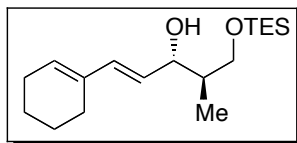

**(3*S*,4*R*,*E*)-5-((Triethylsilyl)oxy)-1-(cyclohex-1-en-1-yl)-4-methylpent-1-en-3-ol (11).** General Procedure C was applied to HBCy<sub>2</sub> (102 mg, 0.572 mmol), CH<sub>2</sub>Cl<sub>2</sub> (0.80 mL), 1-ethynylcyclohexene (65 μL, 0.572 mmol), Et<sub>2</sub>Zn (0.29 mL, 0.58 mmol), EtZnONf (282 mg, 0.716 mmol), (*R*)-3-((triethylsilyl)oxy)-2-methylpropanal (96.5 mg, 0.477 mmol), and toluene (0.51 mL). The crude product was purified by flash chromatography (EtOAc:hexanes, 1:50 to 1:25) to afford the title compound as a clear oil (116 mg, 78% yield, dr 9:1). The product was characterized as a 9:1 mixture of diastereomers. <sup>1</sup>H NMR (CDCl<sub>3</sub>, 500 MHz) major: δ 0.62 (q, 6H), 0.82 (d, *J* = 6.9 Hz, 3H), 0.97 (t, *J* = 8.1 Hz, 9H), 1.63 (m, 4H), 1.78 (m, 1H), 2.12 (m, 4H), 3.59 (dd, *J* = 7.9 Hz, *J* = 10.0 Hz, 1H), 3.79 (dd, *J* = 4.2 Hz, *J* = 9.9 Hz, 1H), 3.88 (d, *J* = 2.9 Hz, 1H), 4.04 (m, 1H), 5.53 (dd, *J* = 7.4 Hz, *J* = 15.8 Hz, 1H), 5.74 (bs, 1H), 6.21 (d, *J* = 15.7 Hz, 1H). <sup>13</sup>C{<sup>1</sup>H} (CDCl<sub>3</sub>, 125 MHz) major: δ 4.4, 6.9, 13.8, 22.7, 22.7, 24.8, 26.1, 40.6, 68.2, 78.6, 127.2, 129.7, 135.1, 135.4. IR (neat): 3428, 2876, 1650, 1625, 1458, 1414, 1240, 1092, 1011, 965, 803, 744 cm<sup>-1</sup>. HRMS calcd for C<sub>18</sub>H<sub>34</sub>N<sub>6</sub>NaSi (M + Na)<sup>+</sup>: 333.2226, found 333.2215.

General Procedure D was applied to HBCy<sub>2</sub> (102 mg, 0.572 mmol), CH<sub>2</sub>Cl<sub>2</sub> (0.80 mL), 1-ethynylcyclohexene (65 μL, 0.572 mmol), Et<sub>2</sub>Zn (0.29 mL, 0.58 mmol), EtZnOTf (174 mg, 0.716 mmol), (*R*)-3-((triethylsilyl)oxy)-2-methylpropanal (96.5 mg, 0.477 mmol), and toluene (0.51 mL). The crude product was purified by flash chromatography (EtOAc:hexanes, 1:50 to 1:25) to afford the title compound as a clear oil (99.8 mg, 67% yield, dr 4.6:1).

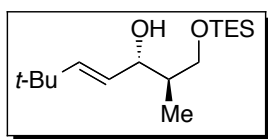

**(2*R*,3*S*,*E*)-1-((Triethylsilyl)oxy)-2,6,6-trimethylhept-4-en-3-ol (12).** General Procedure C was applied to HBCy<sub>2</sub> (99.8 mg, 0.560 mmol), CH<sub>2</sub>Cl<sub>2</sub> (0.78 mL), 3,3-dimethyl butyne (70 μL, 0.70 mmol), Et<sub>2</sub>Zn (0.28 mL, 0.56 mmol), EtZnONf (275 mg, 0.700 mmol), (*R*)-3-((triethylsilyl)oxy)-2-methylpropanal (99.5 mg, 0.467 mmol), and toluene (0.50 mL). The crude product was purified by flash chromatography (EtOAc:hexanes, 1:50 to 1:25) to afford the title compound as a clear oil (95 mg, 71% yield, dr 18:1). The major diastereomer was characterized as a 18:1 mixture of diastereomers. <sup>1</sup>H NMR (CDCl<sub>3</sub>, 500 MHz) major: δ 0.62 (q, 6H), 0.79 (d, *J* = 7.0 Hz, 3H), 0.97 (t, *J* = 8.1 Hz, 9H), 1.02 (s, 9H), 1.75 (m, 1H), 3.58 (dd, *J* = 8.1 Hz, *J* = 10.0 Hz, 1H), 3.79 (dd, *J* = 4.2 Hz, *J* = 10.0 Hz, 1H), 3.94 (dd, *J* = 2.7 Hz, 7.5 Hz, 1H), 3.96 (d, *J* = 2.5 Hz, 1H), 5.35 (dd, *J* = 7.2 Hz, *J* = 15.6 Hz, 1H), 5.68 (dd, *J* = 0.74 Hz, *J* = 15.6 Hz, 1H). <sup>13</sup>C{<sup>1</sup>H} (CDCl<sub>3</sub>, 125 MHz) major: δ 4.4, 6.9, 13.7, 29.8, 33.0, 40.3, 68.3, 78.9, 126.5, 143.9. IR (neat): 3436, 2910, 2877, 1661, 1460, 1415, 1363, 1239, 1094, 1010, 974, 805, 744 cm<sup>-1</sup>. HRMS calcd for C<sub>16</sub>H<sub>34</sub>O<sub>2</sub>NaSi (M + Na)<sup>+</sup>: 309.2226, found 309.2236.

Procedure D was applied to HBCy<sub>2</sub> (99.8 mg, 0.560 mmol), CH<sub>2</sub>Cl<sub>2</sub> (0.78 mL), 3,3-dimethyl butyne (70 μL, 0.70 mmol), Et<sub>2</sub>Zn (0.28 mL, 0.56 mmol), EtZnOTf (171 mg, 0.700 mmol), (*R*)-3-((triethylsilyl)oxy)-2-methylpropanal (99.5 mg, 0.467 mmol), and toluene (0.50 mL). The

crude product was purified by flash chromatography (EtOAc:hexanes, 1:50 to 1:25) to afford the title compound as a clear oil (60.8 mg, 45% yield, dr 10:1).

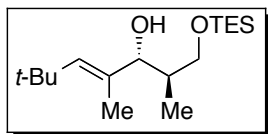

**(2*R*,3*R*,*E*)-1-((Triethylsilyloxy)-2,4,6,6-tetramethylhept-4-en-3-ol**

**(13).** General Procedure C was applied to HBCy<sub>2</sub> (64.8 mg, 0.364 mmol), CH<sub>2</sub>Cl<sub>2</sub> (0.51 mL), 4,4-dimethyl-2-pentyne (49 μL, 0.364 mmol), Et<sub>2</sub>Zn (0.18 mL, 0.364 mmol), EtZnONf (179 mg, 0.455 mmol), (*R*)-3-

((triethylsilyloxy)-2-methylpropanal (61.3 mg, 0.303 mmol), and toluene (0.33 mL). The crude product was purified by flash chromatography (EtOAc:hexanes, 1:50 to 1:25) to afford the title compound as a clear oil (68.8 mg, 76% yield, dr > 20:1).  $[\alpha]_D^{20} = -21.2$  (c = 0.920 CHCl<sub>3</sub>). <sup>1</sup>H NMR (CDCl<sub>3</sub>, 500 MHz): δ 0.63 (q, 6H), 0.68 (d, *J* = 7.0 Hz, 3H), 0.97 (t, *J* = 8.0 Hz, 9H), 1.12 (s, 9H), 1.72 (d, *J* = 1.2 Hz, 3H), 1.85 (m, 1H), 3.58 (dd, *J* = 8.6 Hz, *J* = 9.8 Hz, 1H), 3.74 (dd, *J* = 1.4 Hz, *J* = 8.5 Hz, 1H), 3.78 (dd, *J* = 4.16 Hz, *J* = 10.0 Hz, 1H), 4.16 (d, *J* = 1.7 Hz, 1H), 5.39 (s, 1H). <sup>13</sup>C{<sup>1</sup>H} (CDCl<sub>3</sub>, 125 MHz): δ 4.4, 6.9, 12.0, 13.8, 31.1, 32.4, 37.6, 69.1, 86.1, 134.4, 138.6. IR (neat): 3486, 2911, 2877, 1659, 1460, 1364, 1237, 1091, 1006, 838, 797, 745 cm<sup>-1</sup>. HRMS calcd for C<sub>17</sub>H<sub>36</sub>O<sub>2</sub>NaSi (M + Na)<sup>+</sup>: 323.2382, found 323.2394.

General Procedure D was applied to HBCy<sub>2</sub> (64.8 mg, 0.364 mmol), CH<sub>2</sub>Cl<sub>2</sub> (0.51 mL), 4,4-dimethyl-2-pentyne (49 μL, 0.364 mmol), Et<sub>2</sub>Zn (0.18 mL, 0.364 mmol), EtZnOTf (111 mg, 0.455 mmol), (*R*)-3-((triethylsilyloxy)-2-methylpropanal (61.3 mg, 0.303 mmol), and toluene (0.33 mL). The crude product was purified by flash chromatography (EtOAc:hexanes, 1:50 to 1:25) to afford the title compound as a clear oil (68.8 mg, 76% yield, dr 17.5:1).

**IV. Determination of the Absolute Configuration of 1,3-Diol products. Mosher's Method for the Determination of Absolute Stereochemistry.**

**General Procedure E: Synthesis of *O*-Mosher Ester.** To a solution of the 1,3-diol, pyridine (10 drops), and CH<sub>2</sub>Cl<sub>2</sub> (0.7 mL) was added (*R*)-(-)- $\alpha$ -methoxy- $\alpha$ -(trifluoromethyl)phenylacetyl chloride ((*R*)-MTPA-Cl) at 0 °C. The reaction was warmed to rt and allowed to stir for a period of time as outlined below. Water (1 mL) was added, and the product was extracted with diethyl ether (3 mL x 3). The combined organic phases were dried over MgSO<sub>4</sub> and filtered. The solvent was removed *in vacuo*, and the crude product was purified by flask chromatography on silica gel. The same procedure was used with (*S*)-(+)- $\alpha$ -methoxy- $\alpha$ -(trifluoromethyl)phenylacetyl chloride ((*S*)-MTPA-Cl).

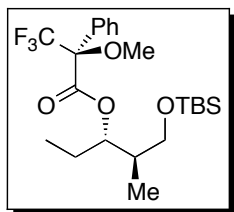

**Preparation of the (*S*)-*O*-Mosher Ester of (2*R*,3*S*)-1-((*tert*-**

**Butyldimethylsilyloxy)-2-methylpentan-3-ol (14).** General Procedure E was applied to (2*R*,3*S*)-1-((*tert*-butyldimethylsilyloxy)-2-methylpentan-3-ol (10.7 mg, 0.046 mmol) and (*R*)-MTPA-Cl (15 μL, 0.082 mmol). The reaction stirred for 3 h. The crude product was purified by column chromatography on silica gel (2% EtOAc in hexanes to 5% EtOAc in

hexanes) to give the desired product as a clear oil. <sup>1</sup>H NMR (CDCl<sub>3</sub>, 500 MHz): δ 0.02 (s, 3H), 0.02 (s, 3H), 0.81 (t, *J* = 7.4 Hz, 3H), 0.89 (s, 9H), 0.91 (d, *J* = 7.1 Hz, 3H), 1.60 (m, 1H), 1.68 (m, 1H), 2.03 (m, 1H), 3.46 (dd, *J* = 6.4 Hz, 10.3 Hz, 1H), 3.54 (s, 3H), 3.55 (dd, *J* = 5.5 Hz, 10.3 Hz, 1H), 5.12 (m, 1H), 7.50 (m, 3H), 7.55 (m, 2H). HRMS calcd for C<sub>22</sub>H<sub>36</sub>O<sub>4</sub>F<sub>3</sub>Si (MH)<sup>+</sup>: 449.2335, found 449.2348.



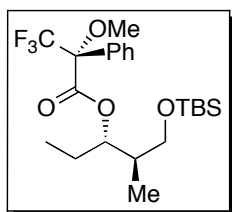

**Preparation of the (*R*)-*O*-Mosher Ester of (2*R*,3*S*)-1-((*tert*-Butyldimethylsilyloxy)-2-methylpentan-3-ol (15).** General Procedure E was applied to (2*R*,3*S*)-1-((*tert*-butyldimethylsilyloxy)-2-methylpentan-3-ol (10.4 mg, 0.045 mmol) and (*S*)-MTPA-Cl (15  $\mu$ L, 0.082 mmol). The reaction stirred for 3 h. The crude product was purified by column chromatography on silica gel (2% EtOAc in hexanes to 5% EtOAc in

hexanes) to give the desired product as a clear oil.  $^1\text{H NMR}$  ( $\text{CDCl}_3$ , 500 MHz):  $\delta$  0.00 (s, 3H), 0.00 (s, 3H), 0.83 (d,  $J=6.9$  Hz, 3H), 0.88 (s, 9H), 0.92 (t,  $J=7.4$  Hz, 3 H), 1.66 (m, 1H), 1.74 (m, 1H), 2.01 (m, 1H), 3.38 (dd,  $J=6.5$  Hz, 10.0 Hz, 1H), 3.51 (dd,  $J=5.7$  Hz, 10.1 Hz, 1H), 3.56 (d,  $J=1.1$  Hz, 1H), 5.11 (m, 1H), 7.40 (m, 3H), 7.56 (m, 2H). HRMS calcd for  $\text{C}_{22}\text{H}_{35}\text{O}_4\text{NaSiF}_3$  ( $\text{M} + \text{Na}$ ) $^+$ : 471.2154, found 471.2149.

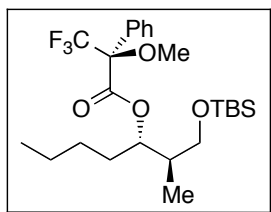

**Preparation of the (*S*)-*O*-Mosher Ester of (2*R*,3*S*)-1-((*tert*-Butyldimethylsilyloxy)-2-methylheptan-3-ol (16).** General Procedure E was applied to (2*R*,3*S*)-1-((*tert*-butyldimethylsilyloxy)-2-methylheptan-3-ol (10.5 mg, 0.040 mmol) and (*R*)-MTPA-Cl (14  $\mu$ L, 0.077 mmol). The reaction stirred for 18 h. The crude product was purified by column chromatography on silica gel (2% EtOAc in hexanes)

to give the desired product as a clear oil.  $^1\text{H NMR}$  ( $\text{CDCl}_3$ , 500 MHz):  $\delta$  0.03 (s, 3H) 0.03 (s, 3H), 0.83 (t,  $J=7.2$  Hz, 3H), 0.90 (s, 9H), 0.91 (d,  $J=7.0$  Hz, 3H), 1.20 (m, 4H), 1.58 (m, 2H), 2.04 (m, 1H), 3.47 (dd,  $J=6.2$  Hz, 10.0 Hz, 1H), 3.56 (m, 4H), 5.20 (m, 1H), 7.41 (m, 3H), 7.56 (m, 2H). HRMS calcd for  $\text{C}_{24}\text{H}_{39}\text{O}_4\text{F}_3\text{NaSi}$  ( $\text{M} + \text{Na}$ ) $^+$ : 499.2467, found 499.2483.

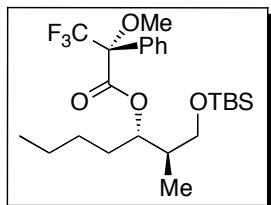

**Preparation of the (*R*)-*O*-Mosher Ester of (2*R*,3*S*)-1-((*tert*-Butyldimethylsilyloxy)-2-methylheptan-3-ol (17).** General Procedure E was applied to (2*R*,3*S*)-1-((*tert*-butyldimethylsilyloxy)-2-methylheptan-3-ol (9.3 mg, 0.035 mmol) and (*S*)-MTPA-Cl (14  $\mu$ L, 0.077 mmol). The reaction stirred for 18 h. The crude product was purified by column chromatography on silica gel (2% EtOAc in hexanes)

to give the desired product as a clear oil.  $^1\text{H NMR}$  ( $\text{CDCl}_3$ , 500 MHz):  $\delta$  0.01 (s, 3H), 0.01 (s, 3H), 0.83 (t,  $J=6.9$  Hz, 3H), 0.89 (m, 12H), 1.29 (m, 4H), 1.65 (m, 2H), 2.01 (m, 1H), 3.39 (dd,  $J=6.5$  Hz, 10.1 Hz, 1H), 3.51 (dd,  $J=6.0$  Hz, 10.1 Hz, 1H), 3.56 (s, 3H), 5.19 (m, 1H), 7.41 (m, 3H), 7.56 (m, 2H). HRMS calcd for  $\text{C}_{24}\text{H}_{39}\text{O}_4\text{NaF}_3\text{Si}$  ( $\text{M} + \text{Na}$ ) $^+$ : 499.2467, found 499.2461.

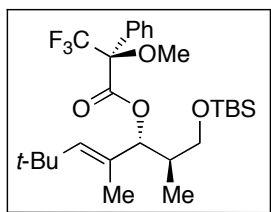

**Preparation of the (*S*)-*O*-Mosher Ester of (2*R*,3*R*,*E*)-1-((*tert*-Butyldimethylsilyloxy)-2,4,6,6-tetramethylhept-4-en-3-ol (18).**

General Procedure B was applied to (2*R*,3*R*,*E*)-1-((*tert*-Butyldimethylsilyloxy)-2,4,6,6-tetramethylhept-4-en-3-ol (10.7 mg, 0.036 mmol) and (*R*)-MTPA-Cl (13  $\mu$ L, 0.068 mmol). The reaction stirred for 18 h. The crude product was purified by column chromatography on silica gel (2% EtOAc in hexanes) to give the desired product as a clear oil.

$^1\text{H}$  NMR ( $\text{CDCl}_3$ , 500 MHz):  $\delta$  0.03 (s, 6H), 0.84 (d,  $J=7.0$  Hz, 3H), 0.90 (s, 9H), 1.12 (s, 9H), 1.48 (s,  $J=1.2$  Hz, 3H), 1.97 (m, 1H) 3.56 (m, 4H), 3.58 (dd,  $J=3.1$  Hz, 8.4 Hz, 1H), 5.13 (d,  $J=10.2$  Hz, 1H), 5.60 ( $J=1.4$  Hz, 1H), 7.39 (m, 3H), 7.49 (m, 2H). HRMS calcd for  $\text{C}_{27}\text{H}_{43}\text{O}_4\text{F}_3\text{NaSi}$  ( $\text{M} + \text{Na}$ ) $^+$ : 539.2780, found 539.2796.

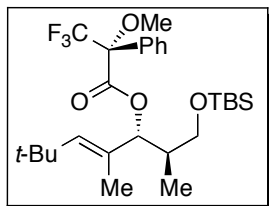

**Preparation of the (*R*)-*O*-Mosher Ester of (*2R,3R,E*)-1-((*tert*-Butyldimethylsilyloxy)-2,4,6,6-tetramethylhept-4-en-3-ol (19).**

General Procedure E was applied to (*2R,3R,E*)-1-((*tert*-Butyldimethylsilyloxy)-2,4,6,6-tetramethylhept-4-en-3-ol (10.3 mg, 0.034 mmol) and (*S*)-MTPA-Cl (13  $\mu\text{L}$ , 0.068 mmol). The reaction stirred for 18 h. The crude product was purified by column

chromatography on silica gel (2% EtOAc in hexanes) to give the desired product as a clear oil.

$^1\text{H}$  NMR ( $\text{CDCl}_3$ , 500 MHz):  $\delta$  0.00 (s, 6H), 0.89 (d,  $J=6.9$  Hz, 3H), 0.89 (s, 9H), 1.14 (s, 9H), 1.69 (d,  $J=1.1$  Hz, 3H), 1.97 (m, 1H), 3.38 (dd, ( $J=6.2$  Hz, 9.7 Hz, 1H), 3.50 (dd,  $J=3.1$  Hz, 9.7 Hz, 1H), 3.53 (s, 3H), 5.20 (d,  $J=10.2$  Hz, 1H), 5.65 (s, 1H), 7.38 (m, 3H), 7.48 (m, 2H). HRMS calcd for  $\text{C}_{27}\text{H}_{43}\text{O}_4\text{F}_3\text{NaSi}$  ( $\text{M} + \text{Na}$ ) $^+$ : 539.2780, found 539.2802.

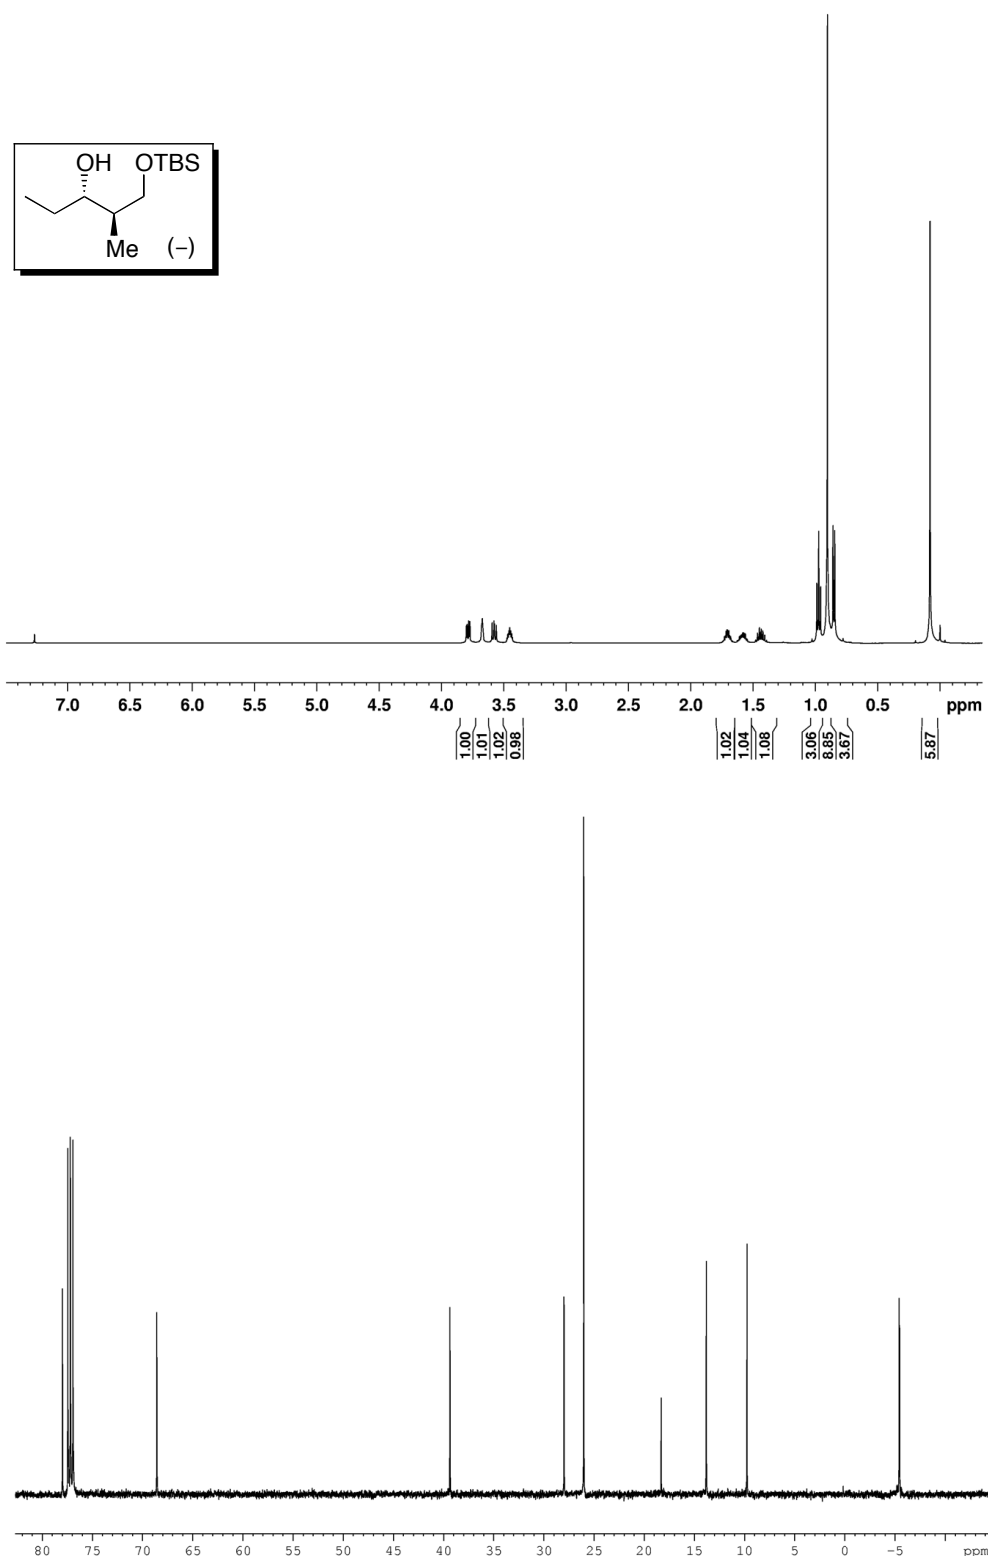

Figure SI-1. 500 MHz  $^1\text{H}$  and 125 MHz  $^{13}\text{C}\{^1\text{H}\}$  NMR in  $\text{CDCl}_3$  of 2

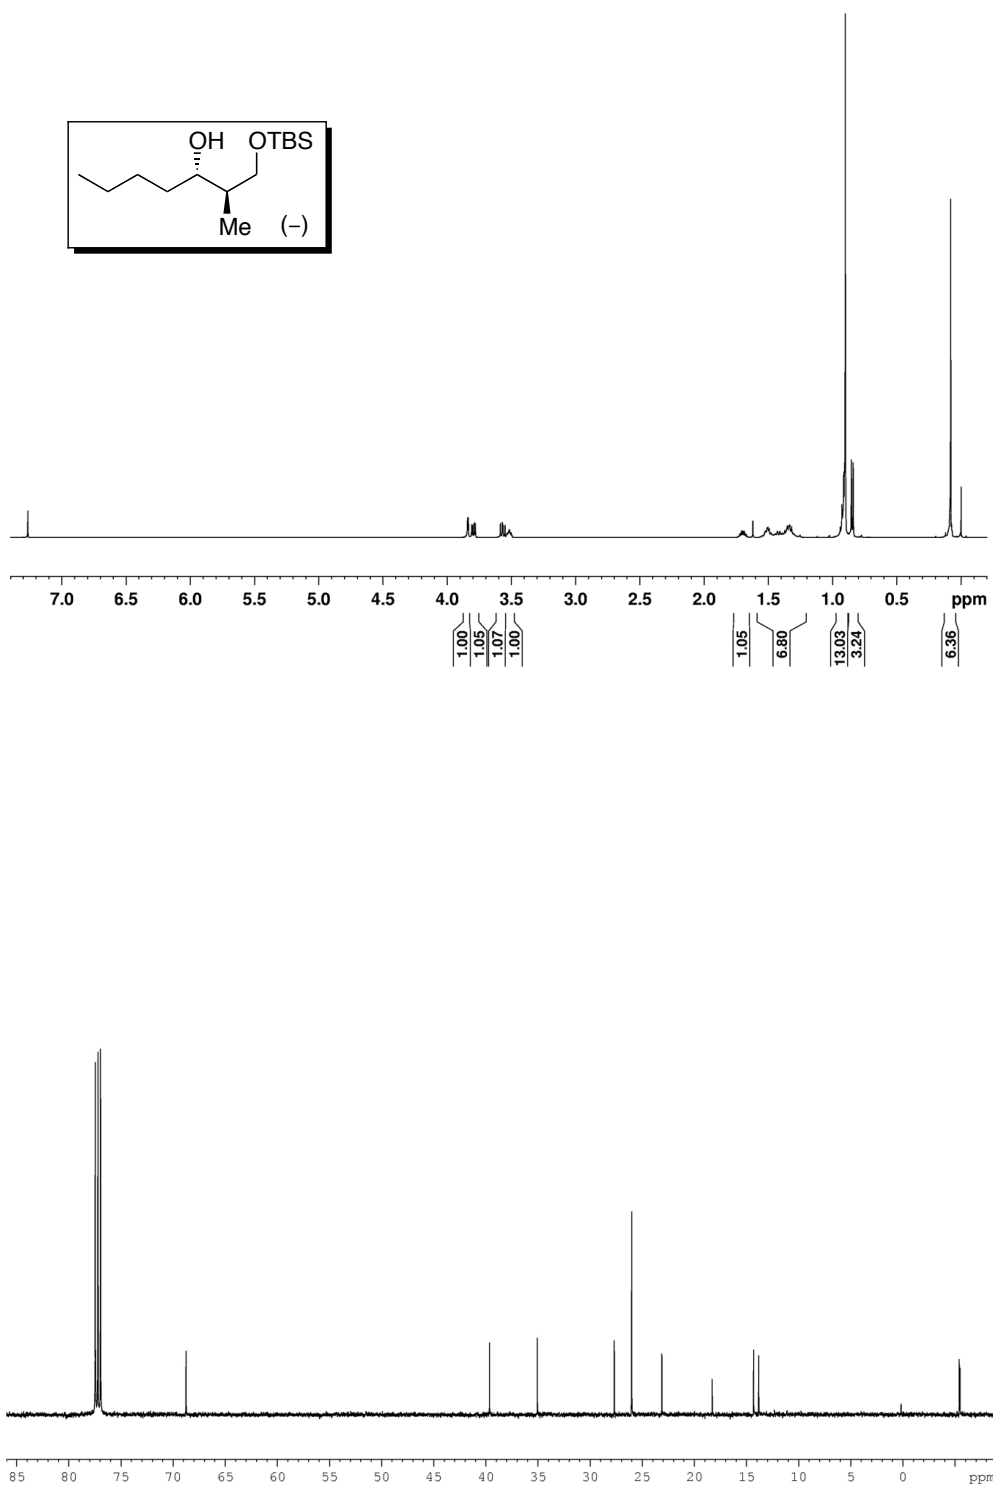

**Figure SI-2.** 500 MHz  $^1\text{H}$  and 125 MHz  $^{13}\text{C}\{^1\text{H}\}$  NMR in  $\text{CDCl}_3$  of **3**

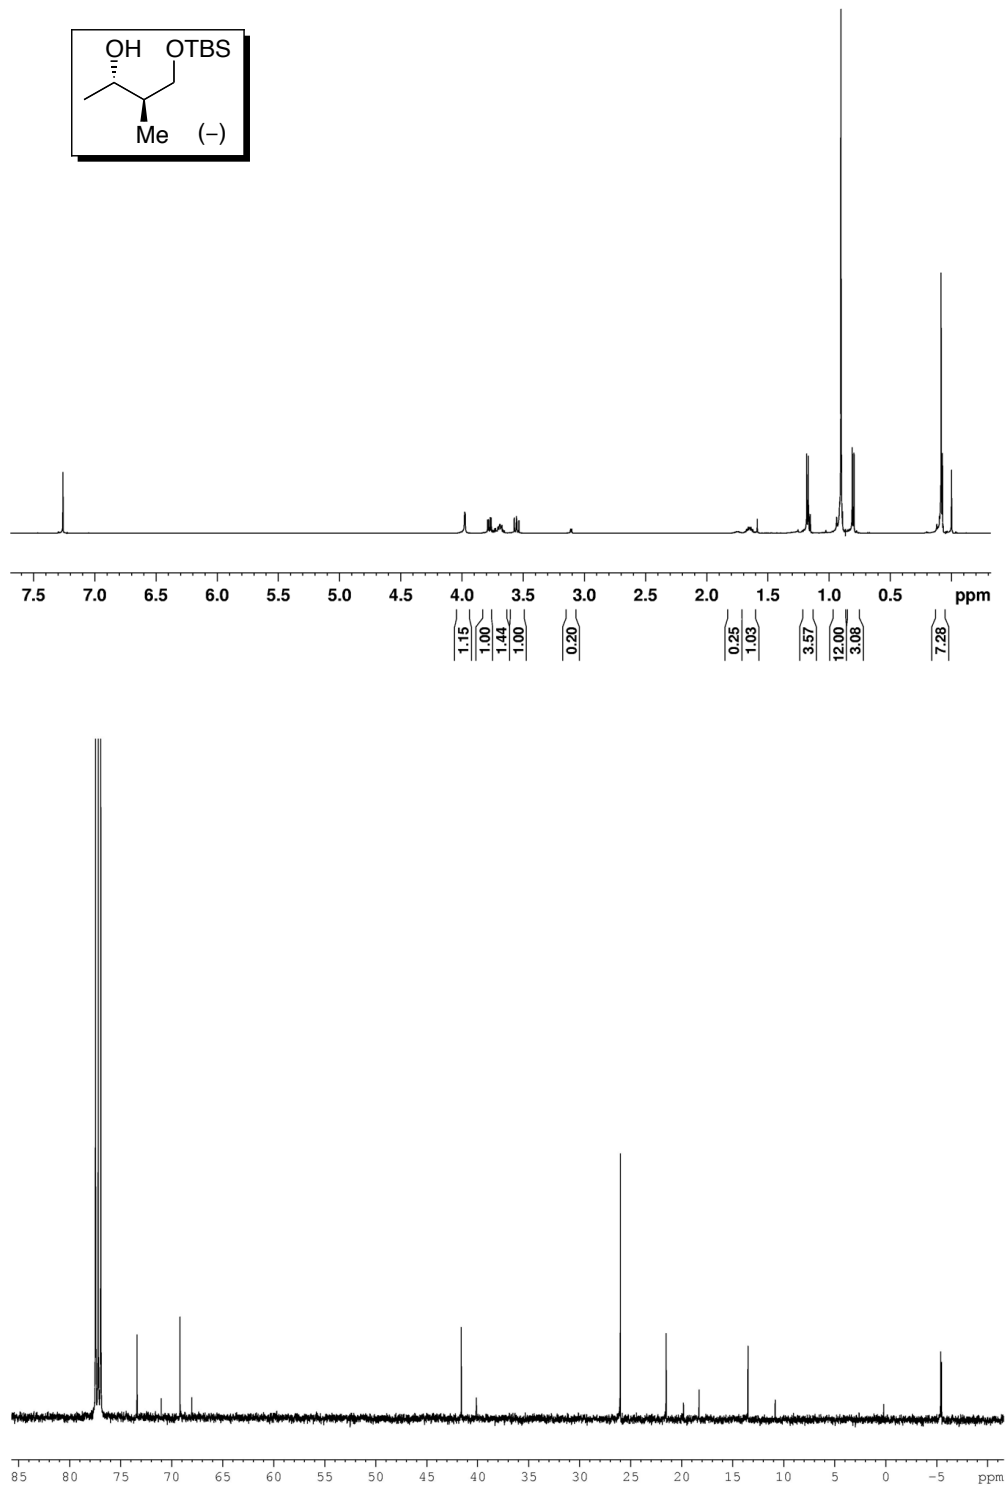

**Figure SI-3.** 500 MHz  $^1\text{H}$  and 125 MHz  $^{13}\text{C}\{^1\text{H}\}$  NMR in CDCl<sub>3</sub> of **4**

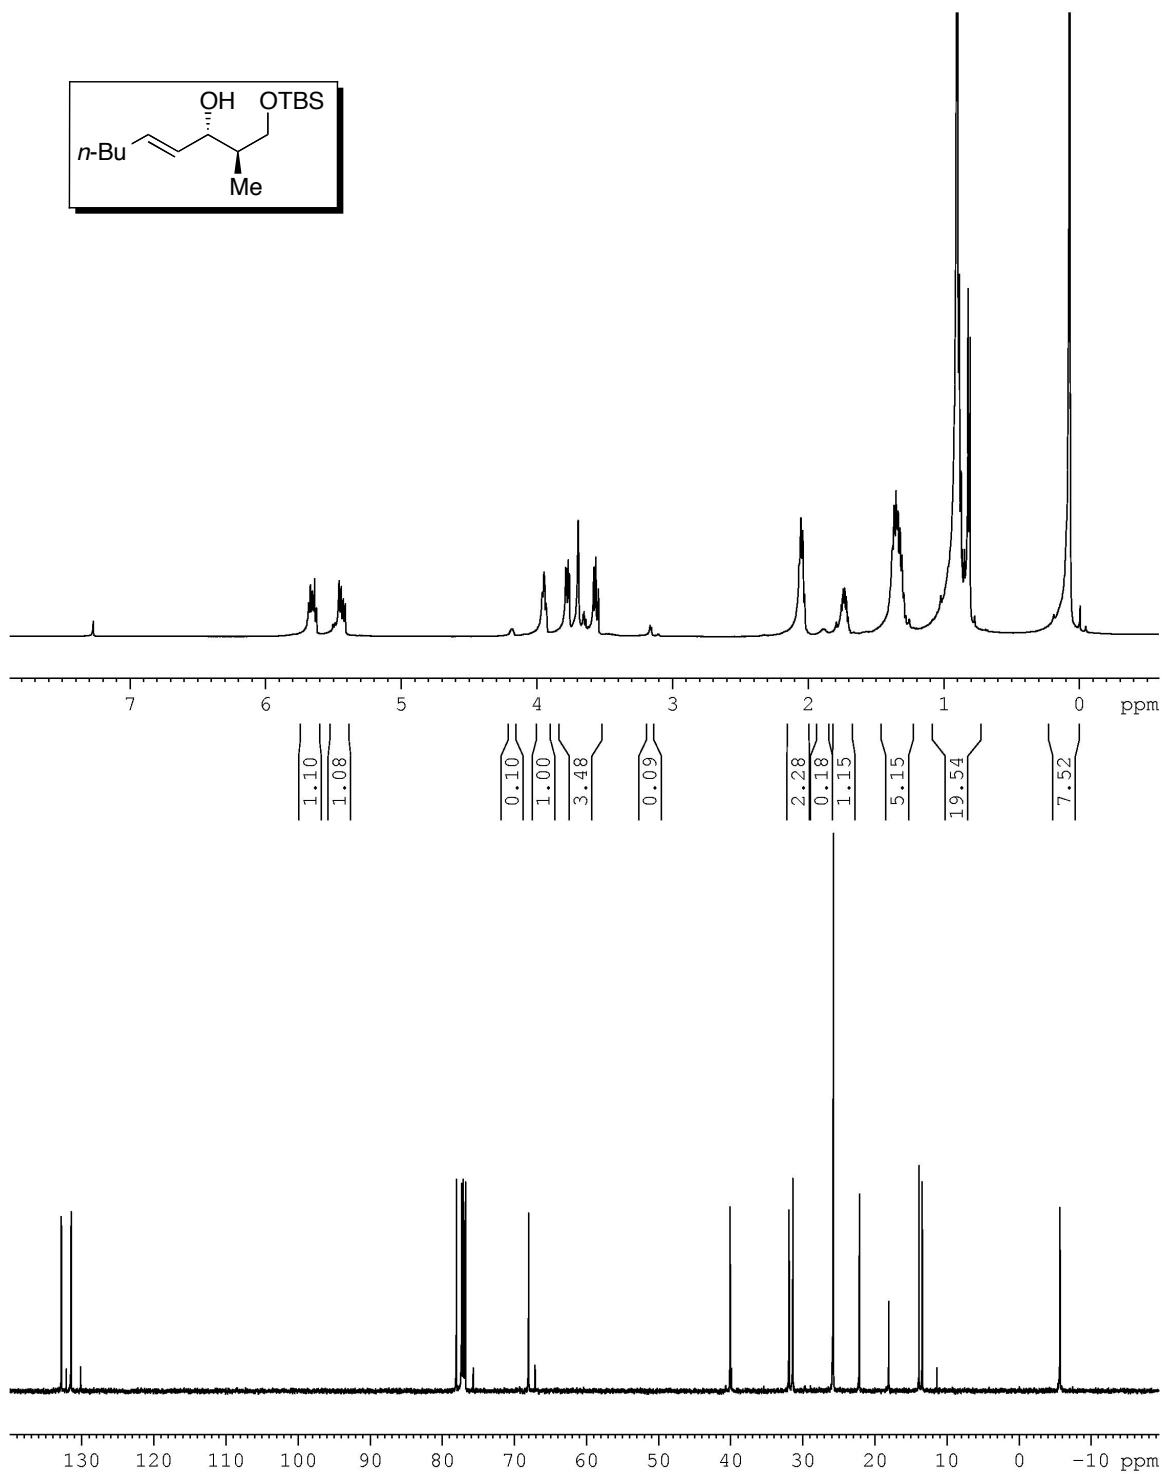

**Figure SI-4.** 500 MHz  $^1\text{H}$  and 125 MHz  $^{13}\text{C}\{^1\text{H}\}$  NMR in  $\text{CDCl}_3$  of **5**

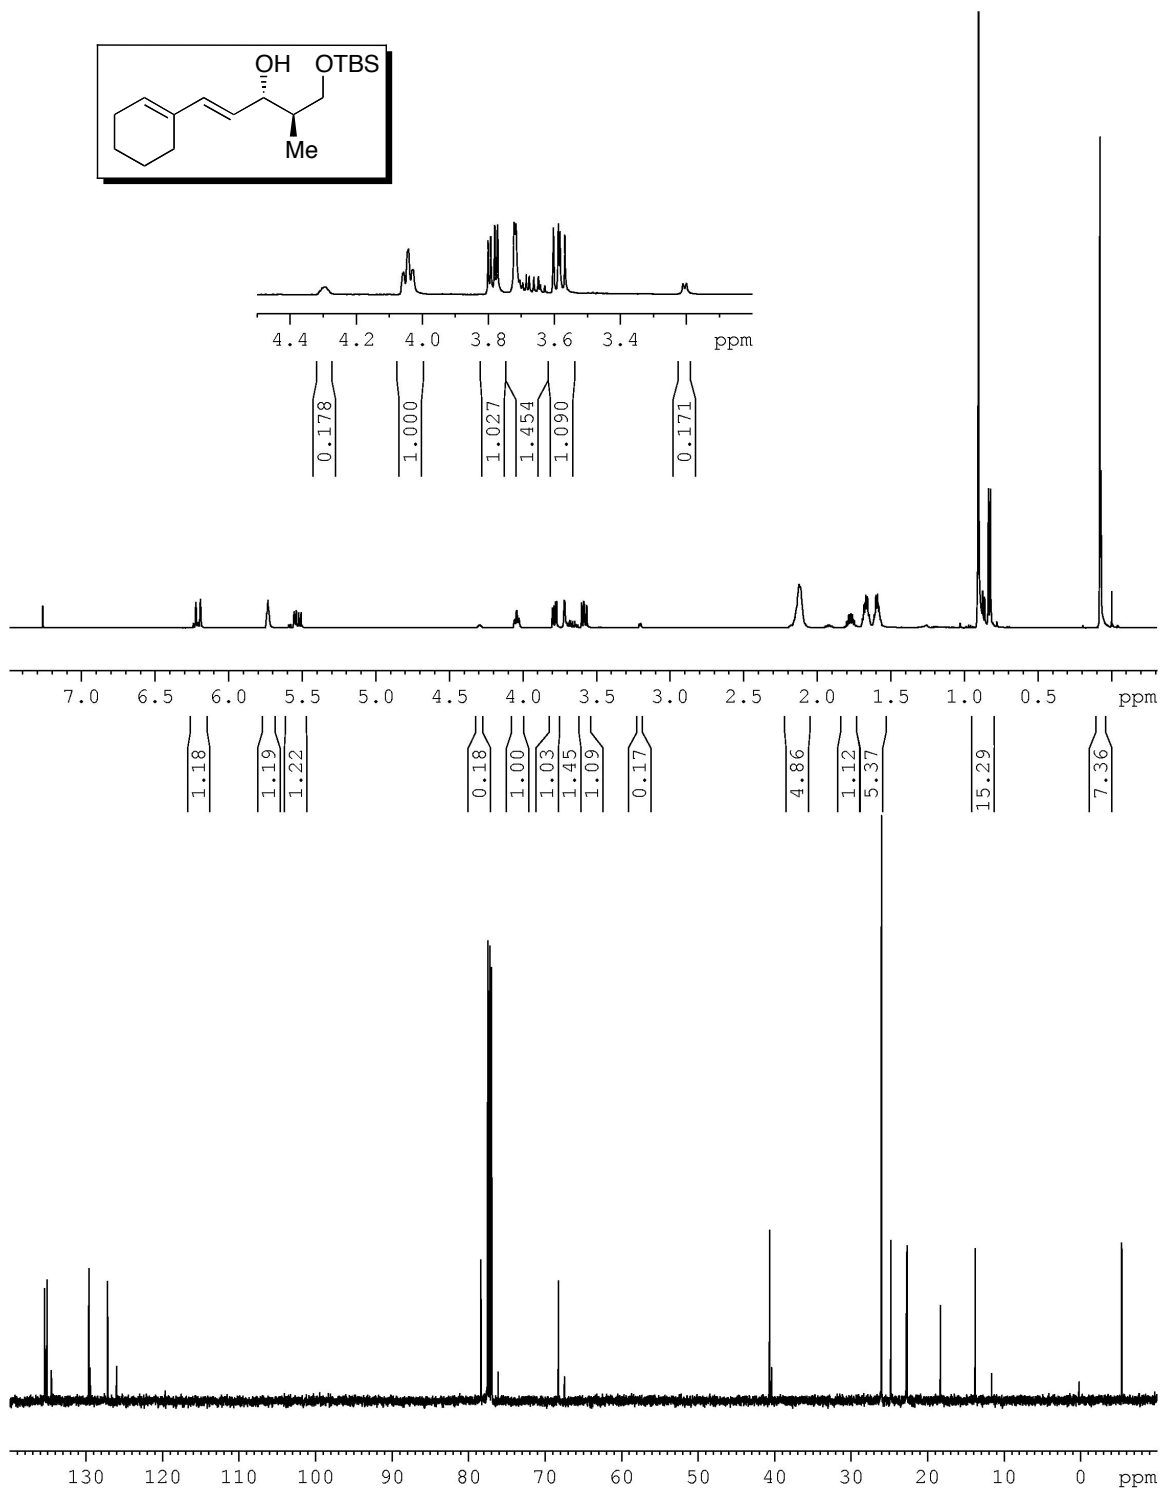

**Figure SI-5.** 500 MHz <sup>1</sup>H and 125 MHz <sup>13</sup>C{<sup>1</sup>H} NMR in CDCl<sub>3</sub> of **6**







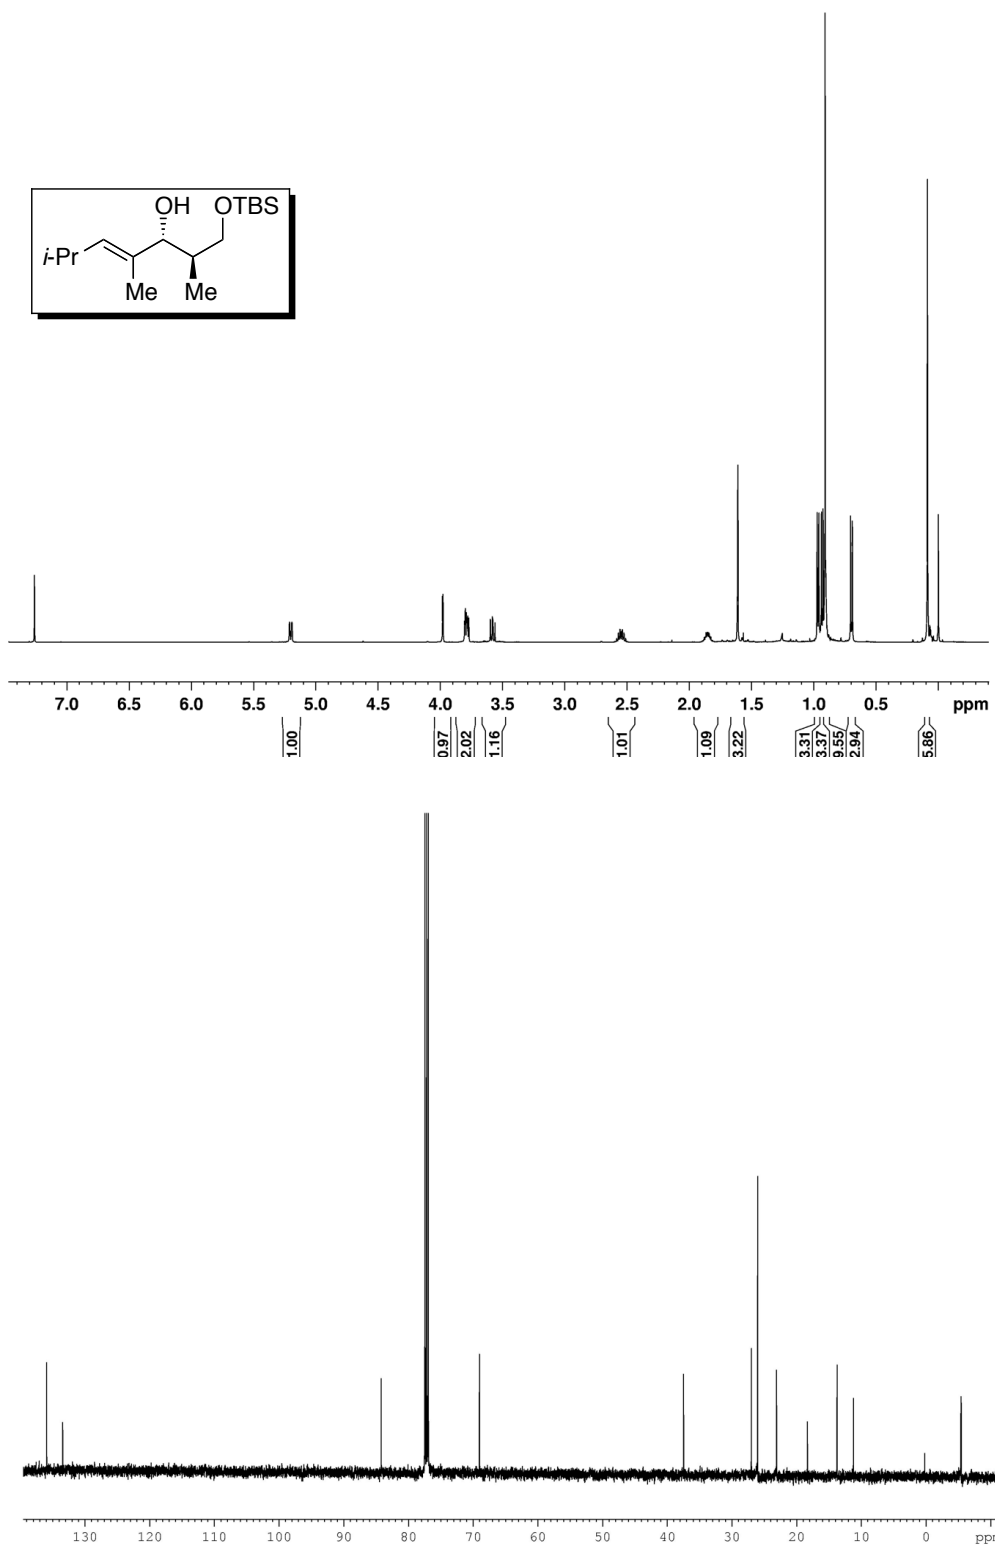

**Figure SI-8.** 500 MHz  $^1\text{H}$  and 125 MHz  $^{13}\text{C}\{^1\text{H}\}$  NMR in  $\text{CDCl}_3$  of **9**

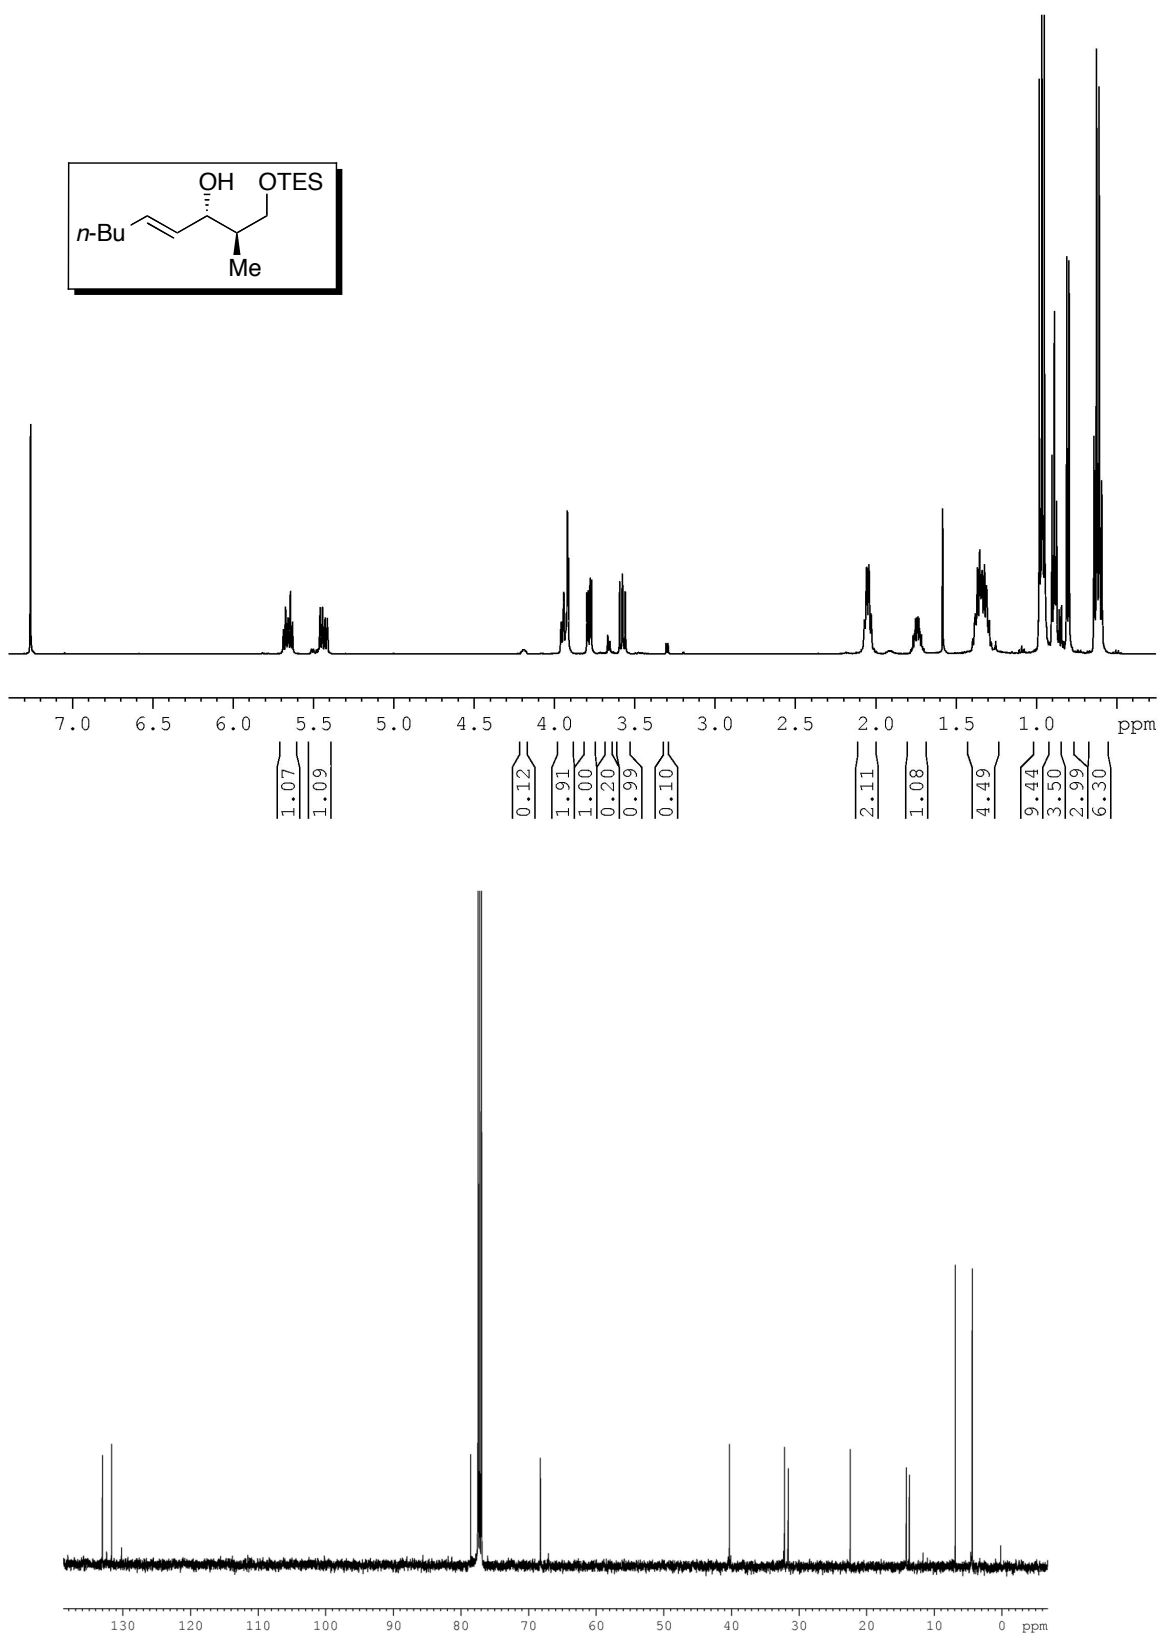

**Figure SI-9.** 500 MHz  $^1\text{H}$  and 125 MHz  $^{13}\text{C}\{^1\text{H}\}$  NMR in  $\text{CDCl}_3$  of **10**

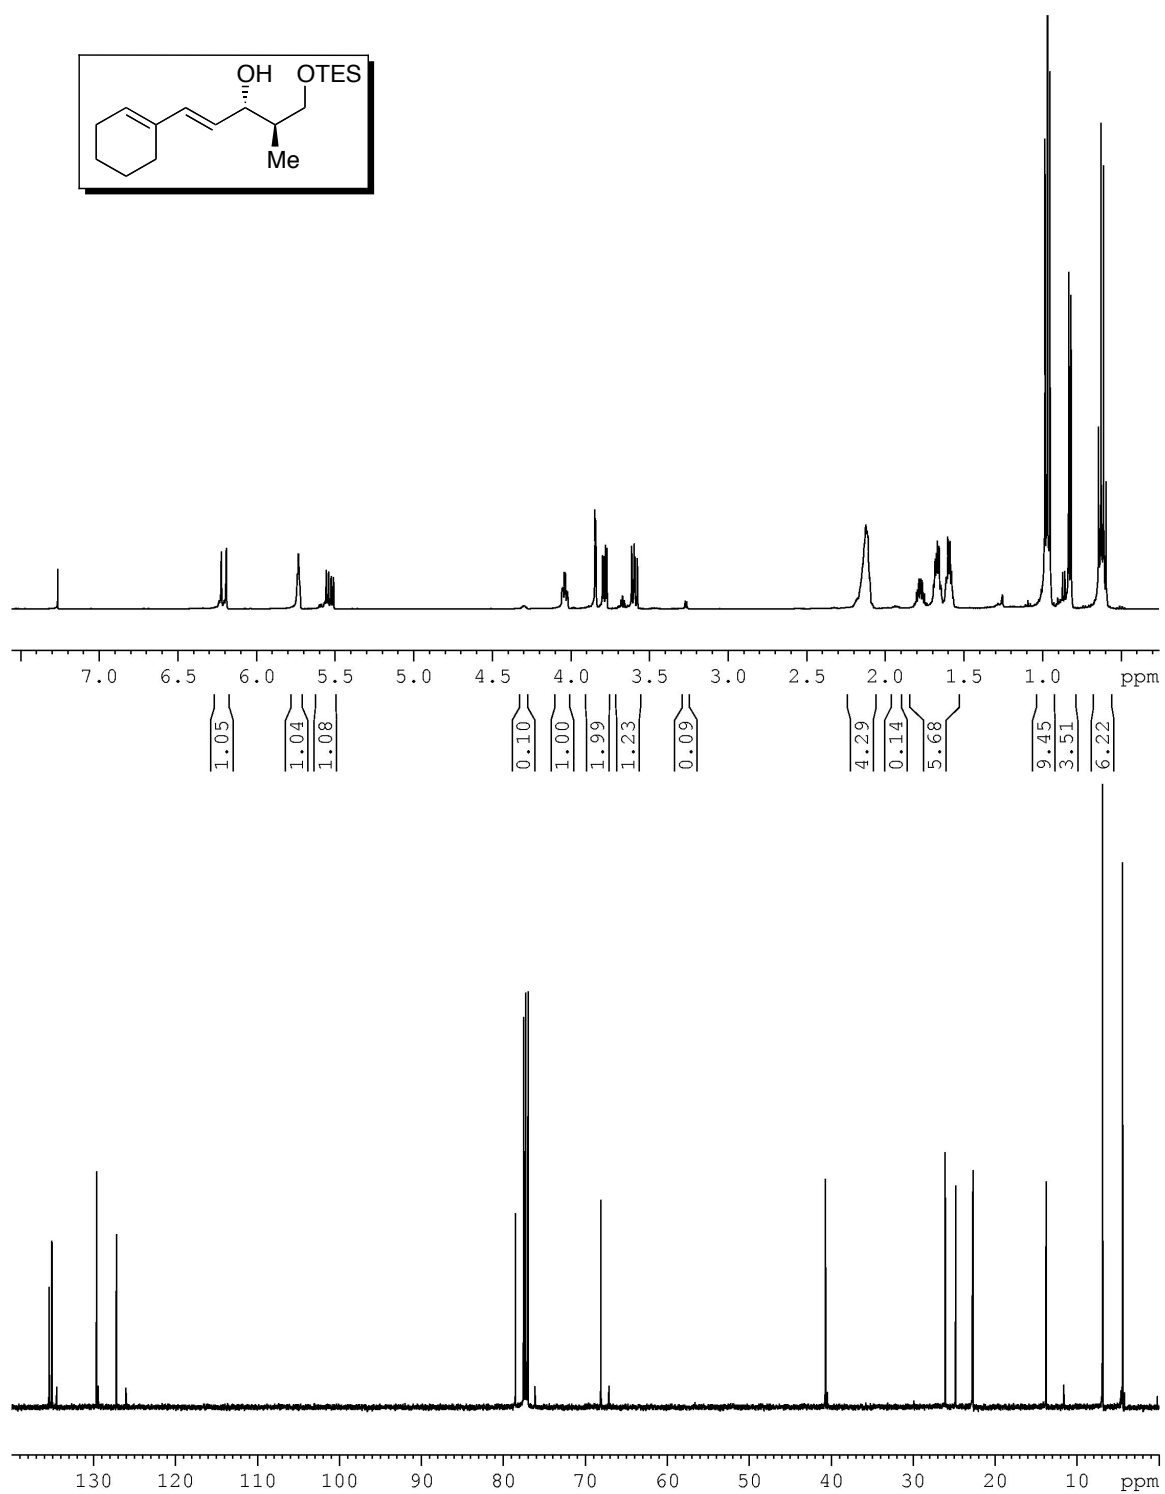

**Figure SI-10.** 500 MHz <sup>1</sup>H and 125 MHz <sup>13</sup>C{<sup>1</sup>H} NMR in CDCl<sub>3</sub> of **11**

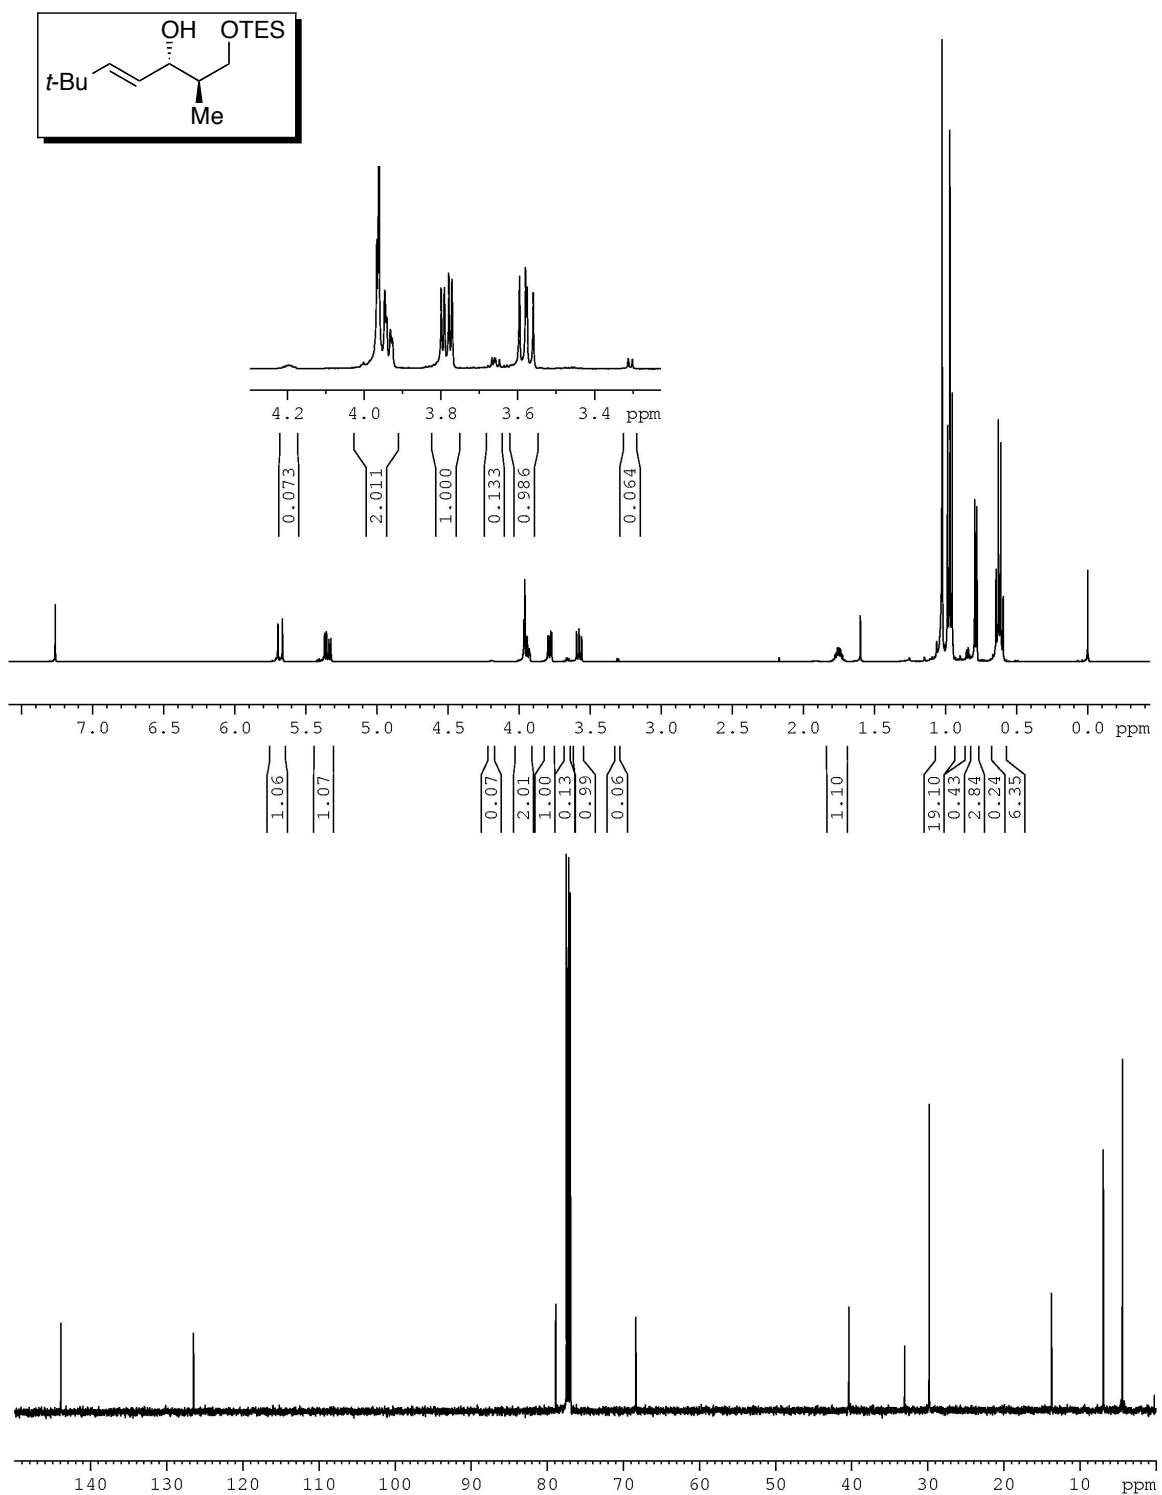

**Figure SI-11.** 500 MHz  $^1\text{H}$  and 125 MHz  $^{13}\text{C}\{^1\text{H}\}$  NMR in  $\text{CDCl}_3$  of **12**

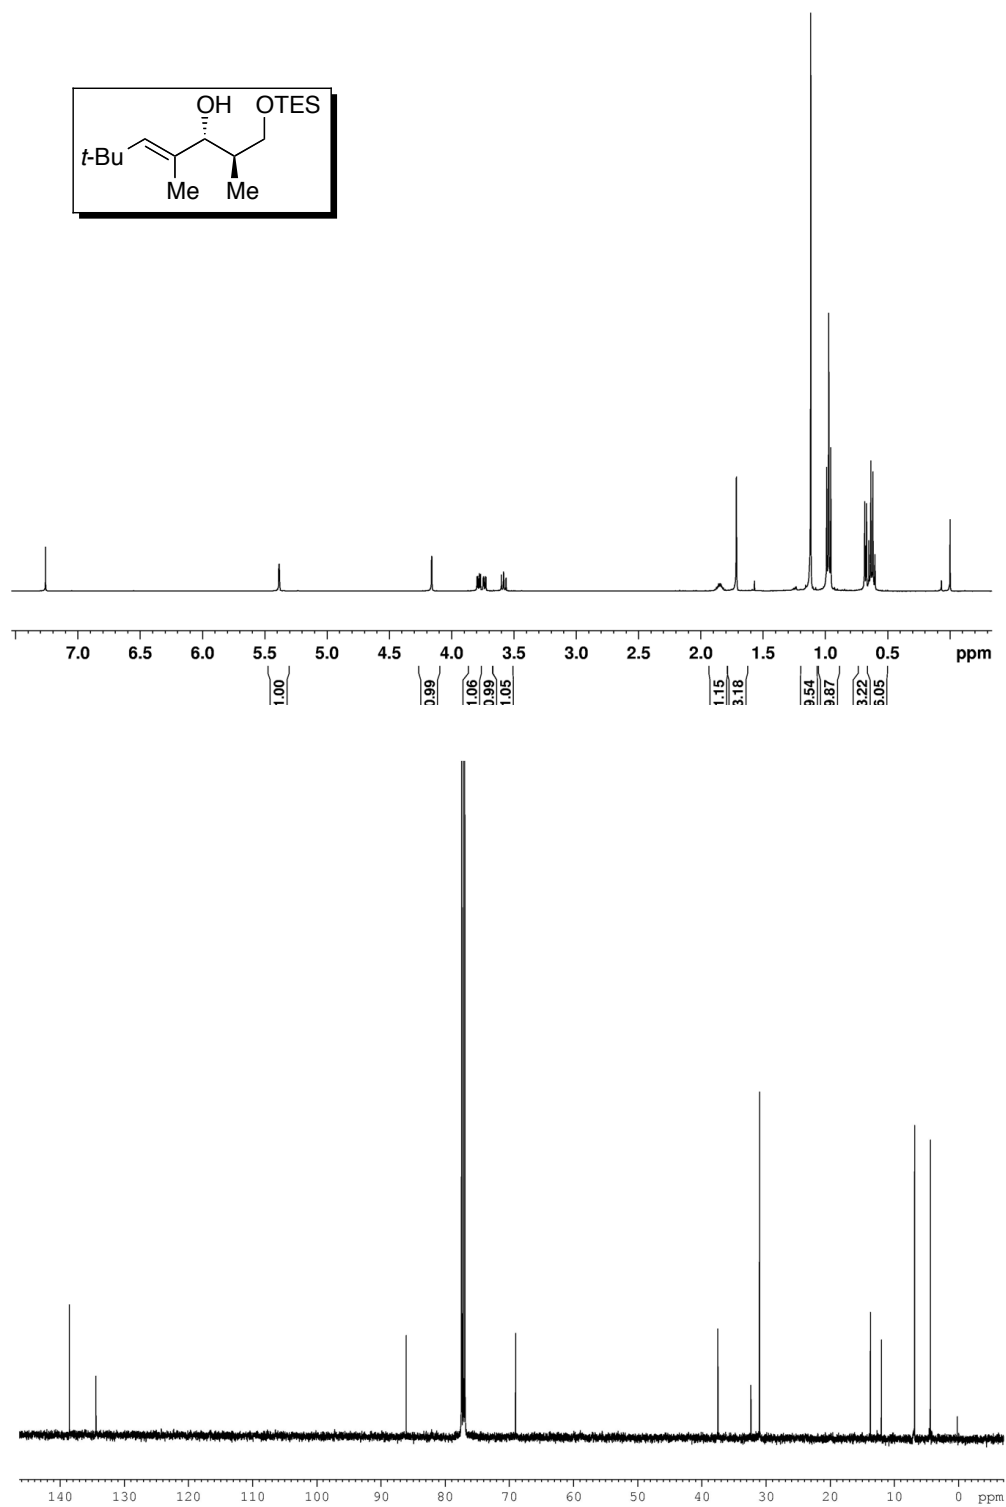

**Figure SI-12.** 500 MHz  $^1\text{H}$  and 125 MHz  $^{13}\text{C}\{^1\text{H}\}$  NMR in  $\text{CDCl}_3$  of **13**

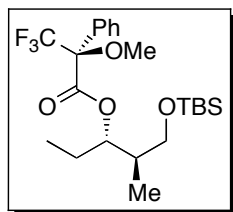

(*S*)-*O*-Mosher ester

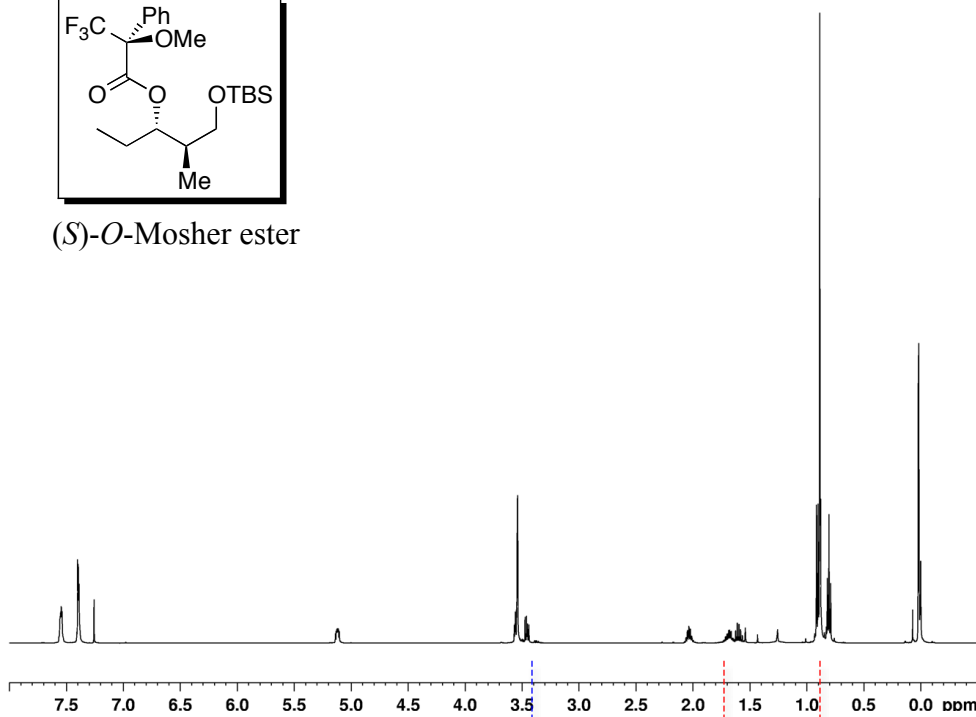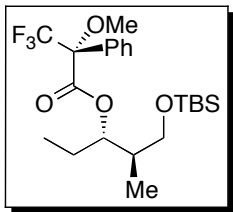

(*R*)-*O*-Mosher ester

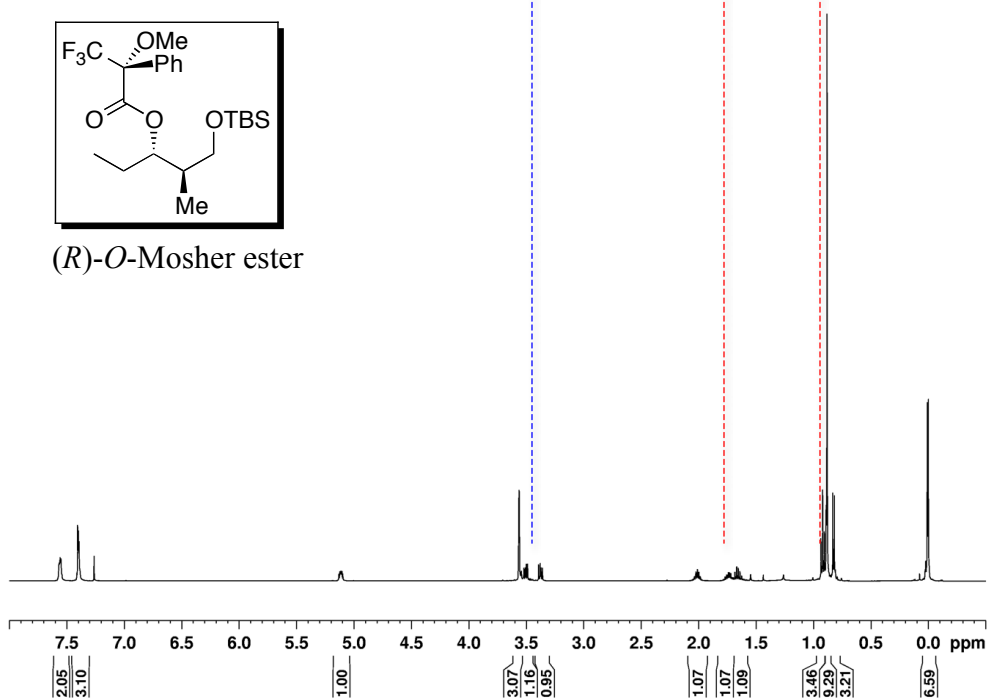

**Figure SI-13.** 500 MHz  $^1\text{H}$  NMR of (*S*)-*O*-Mosher ester **14** and (*R*)-*O*-Mosher ester **15** in  $\text{CDCl}_3$

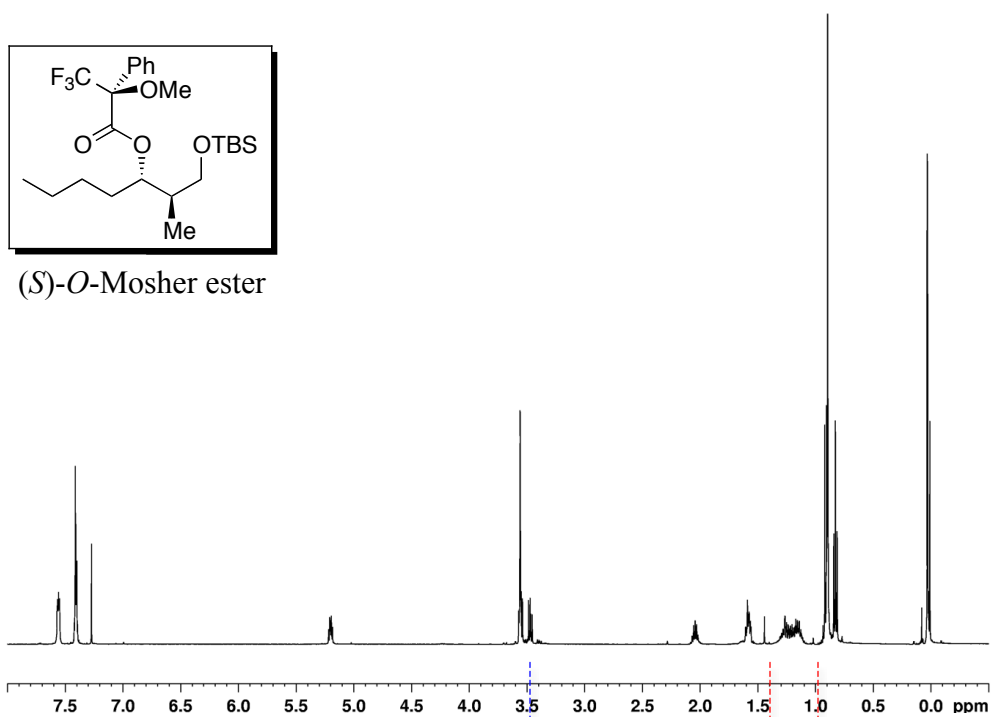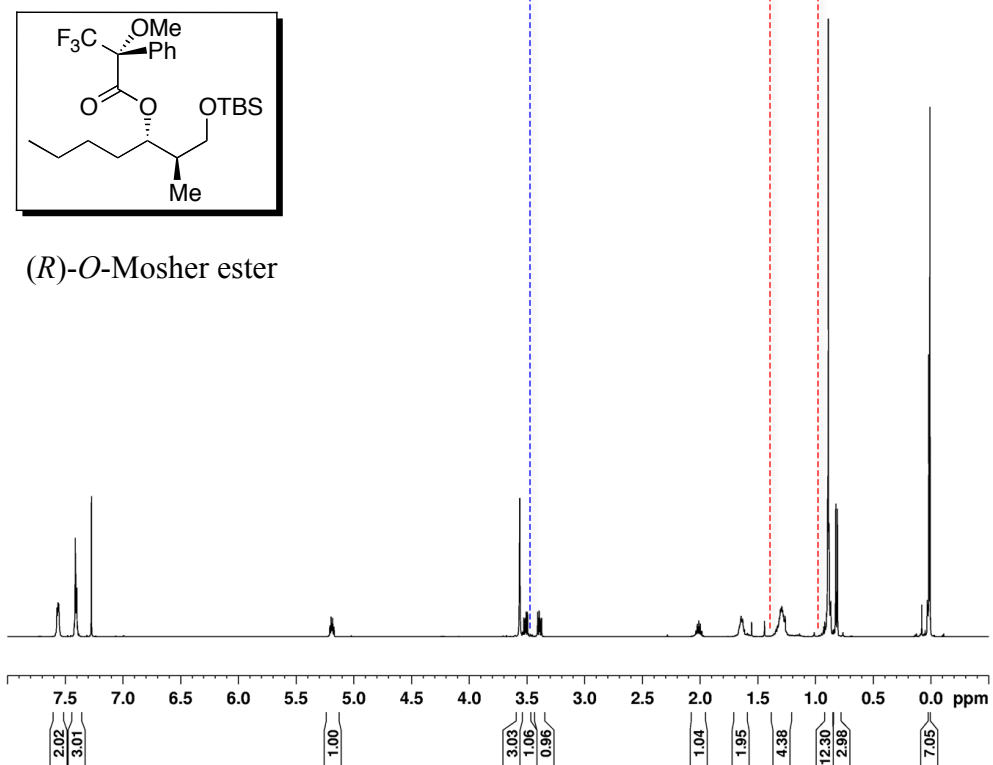

**Figure SI-14.** 500 MHz  $^1\text{H}$  NMR of (*S*)-*O*-Mosher ester **16** and (*R*)-*O*-Mosher ester **17** in  $\text{CDCl}_3$



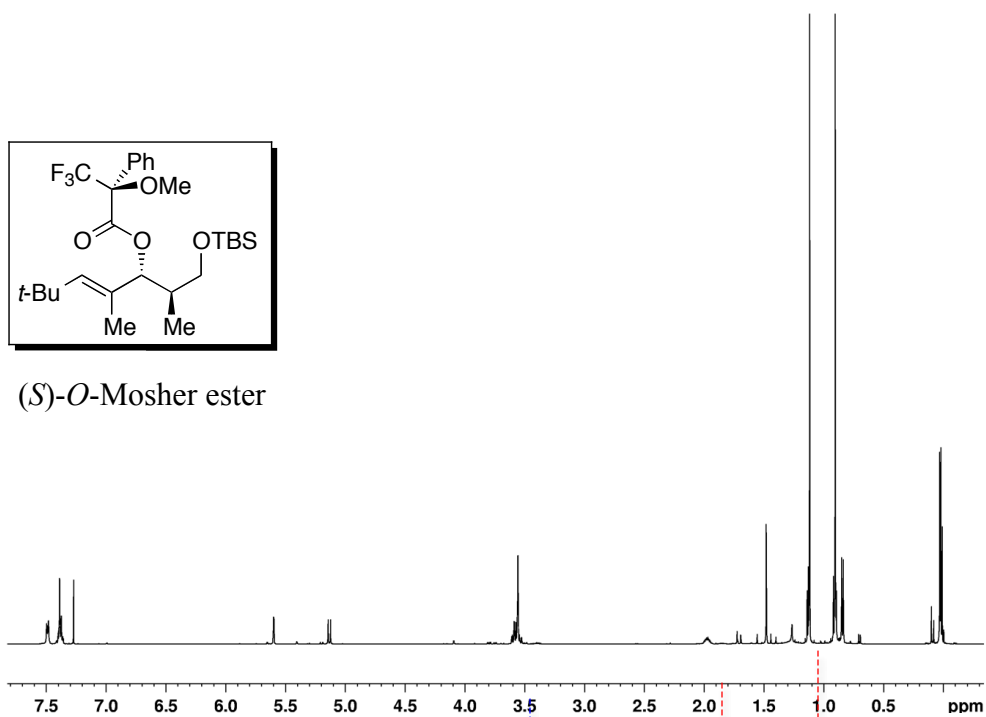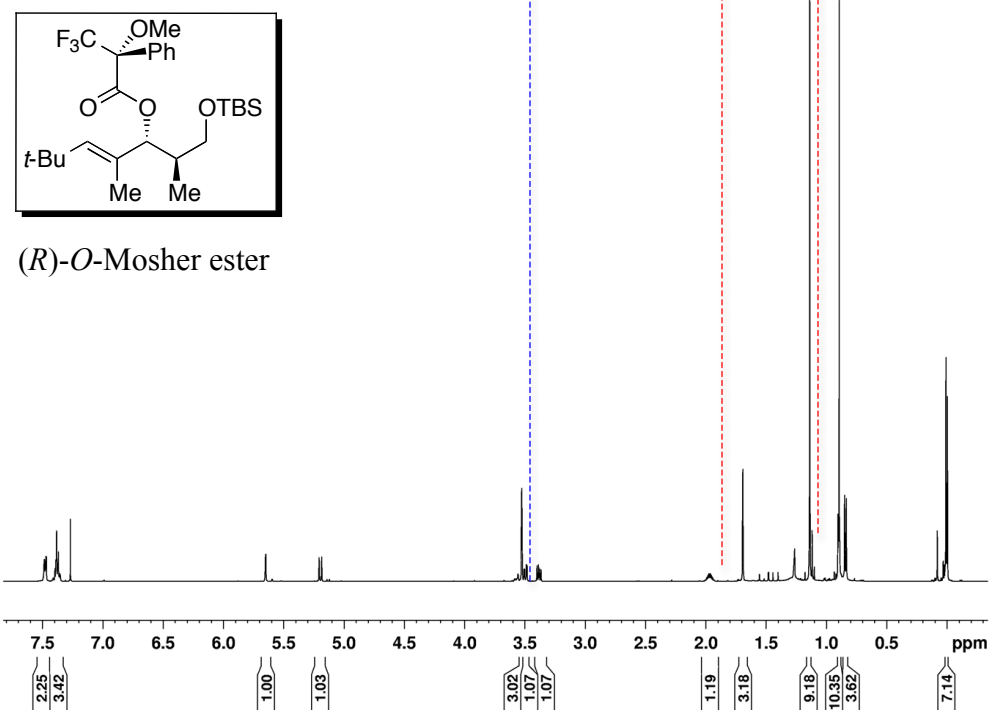

**Figure SI-15.** 500 MHz  $^1\text{H}$  NMR of (*S*)-*O*-Mosher ester **18** and (*R*)-*O*-Mosher ester **19** in  $\text{CDCl}_3$
